# Supplementary material
Source: Copernicus journal article supplement (doi:10.5194/ar-4-231-2026)
Supplement: Supplementary file 1 [file ar-4-231-2026-supplement.pdf]

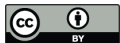

*Supplement of*

## **Assessing the sources of submicron airborne elements at two sites in the Fos-Marseille basin through rolling positive matrix factorization**

**Mathilde Brezins et al.**

*Correspondence to:* Benjamin Chazeau ([benjamin.chazeau@univ-amu.fr](mailto:benjamin.chazeau@univ-amu.fr))  
and Barbara D'Anna ([barbara.danna@univ-amu.fr](mailto:barbara.danna@univ-amu.fr))

The copyright of individual parts of the supplement might differ from the article licence.

**Detection Limits for Xact 625i – Cooper Environmental Services**

| Xact 625i Minimum Detection Limits<br>(ng m <sup>-3</sup> )<br>For larger spot size<br>68% Confidence Level (C <sub>1σ</sub> ) per US EPA IO3.3 and Currie * |                  |                              |      |       |       |       |       |
|--------------------------------------------------------------------------------------------------------------------------------------------------------------|------------------|------------------------------|------|-------|-------|-------|-------|
| Element<br>(At. No.)                                                                                                                                         | Atomic<br>Number | Sampling/Analysis Time (min) |      |       |       |       |       |
|                                                                                                                                                              |                  | 15                           | 30   | 60    | 120   | 180   | 240   |
| Al (13)                                                                                                                                                      | 13               | 1500                         | 500  | 170   | 61    | 33    | 22    |
| Si (14)                                                                                                                                                      | 14               | 260                          | 89   | 31    | 11    | 5.9   | 3.8   |
| P (15)                                                                                                                                                       | 15               | 76                           | 26   | 9.0   | 3.2   | 1.7   | 1.1   |
| S (16)                                                                                                                                                       | 16               | 46                           | 16   | 5.5   | 1.9   | 1.0   | 0.68  |
| Cl (17)                                                                                                                                                      | 17               | 25                           | 8.6  | 3.0   | 1.1   | 0.57  | 0.37  |
| K (19)                                                                                                                                                       | 19               | 17                           | 5.8  | 2.0   | 0.71  | 0.39  | 0.25  |
| Ca (20)                                                                                                                                                      | 20               | 4.4                          | 1.5  | 0.52  | 0.18  | 0.099 | 0.064 |
| Ti (22)                                                                                                                                                      | 22               | 2.3                          | 0.79 | 0.28  | 0.097 | 0.053 | 0.034 |
| V (23)                                                                                                                                                       | 23               | 1.7                          | 0.60 | 0.21  | 0.073 | 0.040 | 0.026 |
| Cr (24)                                                                                                                                                      | 24               | 1.7                          | 0.58 | 0.20  | 0.071 | 0.038 | 0.025 |
| Mn (25)                                                                                                                                                      | 25               | 2.1                          | 0.71 | 0.25  | 0.087 | 0.047 | 0.031 |
| Fe (26)                                                                                                                                                      | 26               | 2.5                          | 0.85 | 0.30  | 0.11  | 0.057 | 0.037 |
| Co (27)                                                                                                                                                      | 27               | 2.0                          | 0.68 | 0.24  | 0.085 | 0.046 | 0.030 |
| Ni (28)                                                                                                                                                      | 28               | 1.4                          | 0.47 | 0.17  | 0.059 | 0.032 | 0.021 |
| Cu (29)                                                                                                                                                      | 29               | 1.1                          | 0.39 | 0.14  | 0.048 | 0.026 | 0.017 |
| Zn (30)                                                                                                                                                      | 30               | 0.95                         | 0.33 | 0.12  | 0.041 | 0.022 | 0.014 |
| Ga (31)                                                                                                                                                      | 31               | 0.83                         | 0.29 | 0.10  | 0.036 | 0.019 | 0.013 |
| Ge (32)                                                                                                                                                      | 32               | 0.79                         | 0.28 | 0.097 | 0.034 | 0.019 | 0.012 |
| As (33)                                                                                                                                                      | 33               | 0.90                         | 0.31 | 0.11  | 0.039 | 0.021 | 0.014 |
| Se (34)                                                                                                                                                      | 34               | 1.2                          | 0.40 | 0.14  | 0.050 | 0.027 | 0.018 |
| Br (35)                                                                                                                                                      | 35               | 1.5                          | 0.52 | 0.18  | 0.064 | 0.035 | 0.023 |
| Rb (37)                                                                                                                                                      | 37               | 2.7                          | 0.95 | 0.33  | 0.12  | 0.064 | 0.042 |
| Sr (38)                                                                                                                                                      | 38               | 3.1                          | 1.1  | 0.38  | 0.13  | 0.072 | 0.047 |
| Y (39)                                                                                                                                                       | 39               | 3.9                          | 1.4  | 0.48  | 0.17  | 0.092 | 0.060 |
| Zr (40)                                                                                                                                                      | 40               | 4.7                          | 1.6  | 0.57  | 0.20  | 0.11  | 0.071 |

|         |    |     |      |      |       |       |       |
|---------|----|-----|------|------|-------|-------|-------|
| Nb (41) | 41 | 5.8 | 2.0  | 0.70 | 0.25  | 0.13  | 0.088 |
| Pd (46) | 46 | 31  | 11   | 3.8  | 1.3   | 0.73  | 0.48  |
| Ag (47) | 47 | 27  | 9.5  | 3.3  | 1.2   | 0.64  | 0.42  |
| Cd (48) | 48 | 36  | 12   | 4.4  | 1.5   | 0.84  | 0.54  |
| In (49) | 49 | 44  | 15   | 5.4  | 1.9   | 1.0   | 0.67  |
| Sn (50) | 50 | 58  | 20   | 7.1  | 2.5   | 1.4   | 0.88  |
| Sb (51) | 51 | 73  | 26   | 9.0  | 3.2   | 1.7   | 1.11  |
| I (53)  | 53 |     | 1.4  | 0.49 |       |       |       |
| Ba (56) | 56 | 5.7 | 1.9  | 0.67 | 0.24  | 0.13  | 0.083 |
| Pt (78) | 78 | 1.7 | 0.58 | 0.20 | 0.072 | 0.039 | 0.025 |
| Au (79) | 79 | 1.4 | 0.50 | 0.18 | 0.062 | 0.034 | 0.022 |
| Hg (80) | 80 | 1.7 | 0.60 | 0.21 | 0.074 | 0.040 | 0.026 |
| Tl (81) | 81 | 1.7 | 0.57 | 0.20 | 0.071 | 0.039 | 0.025 |
| Pb (82) | 82 | 1.8 | 0.63 | 0.22 | 0.078 | 0.042 | 0.027 |
| Bi (83) | 83 | 1.8 | 0.64 | 0.23 | 0.080 | 0.043 | 0.028 |

1 Table S1: Xact 625i Minimum Detection Limits ( $\text{ng m}^{-3}$ ) for larger spot size at 68% Confidence Level, as given by the constructor

2

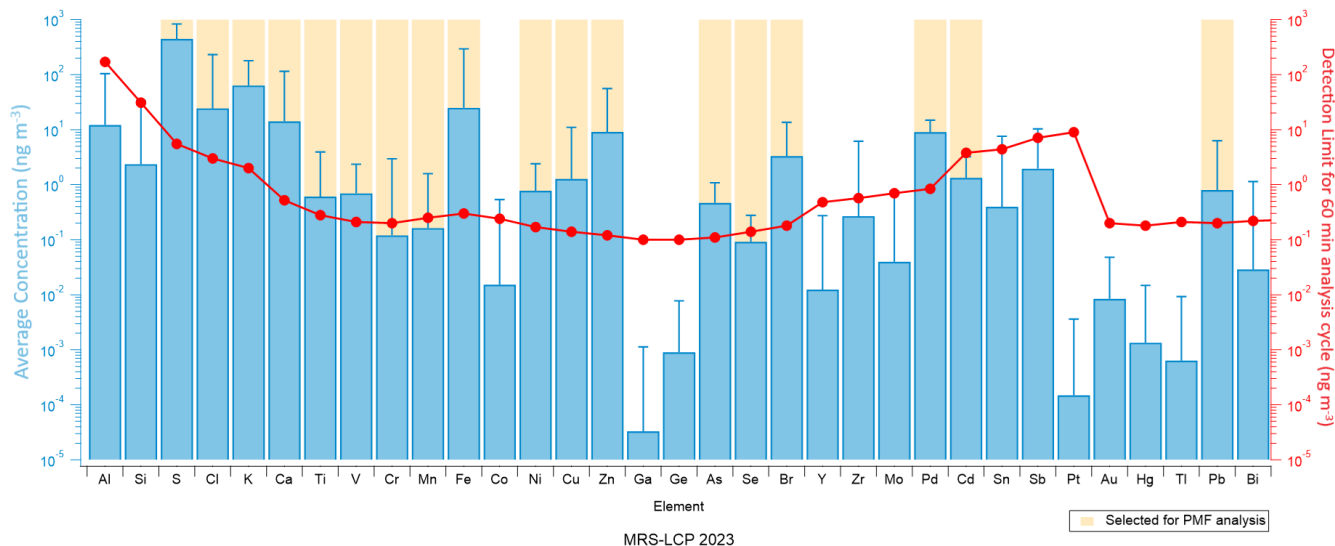

3

4 Figure S1: Average concentrations of elements in PM<sub>1</sub> over the entire campaign at MRS-LCP. The red dotted line represents the  
5 Xact 625i MDL for 60-minute sampling intervals, while the error bars indicate the standard deviation. Yellow-shaded areas highlight  
6 the elements selected for PMF analysis.

7

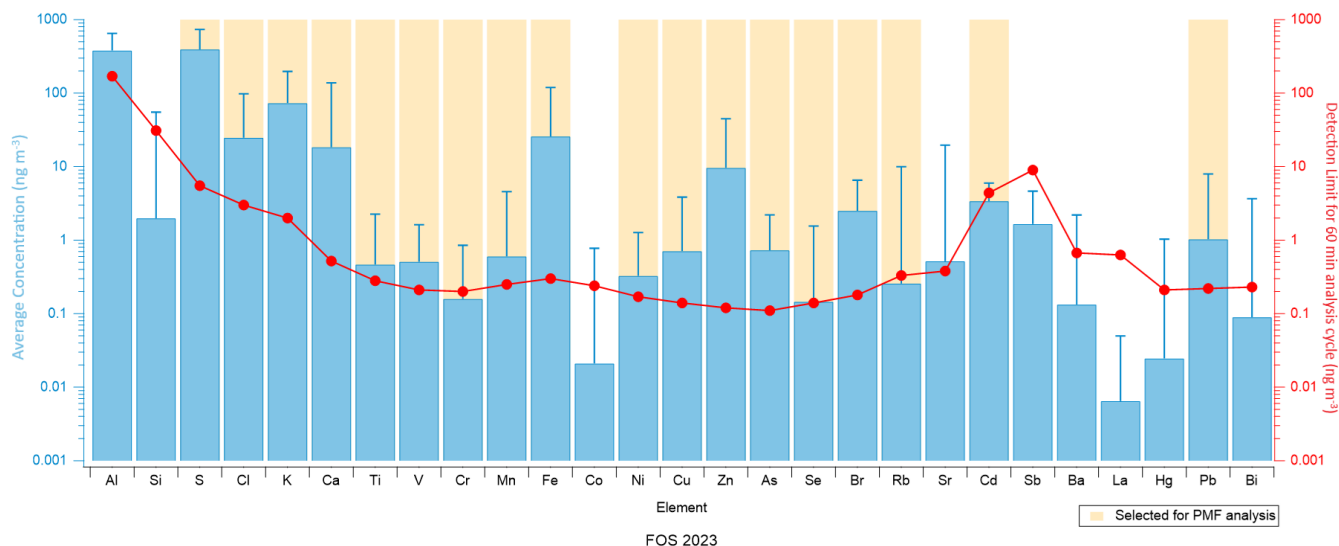

8

9 **Figure S2: Average concentrations of elements in PM<sub>1</sub> over the entire campaign at FOS. The red dotted line represents the Xact 625i**  
 10 **MDL for 60-minute sampling intervals, while the error bars indicate the standard deviation. Yellow-shaded areas highlight the**  
 11 **elements selected for PMF analysis.**

12

### 13 S1: PMF methodology

14 Positive Matrix Factorization (PMF) is a powerful bilinear receptor model that describes multivariate datasets as a linear  
 15 combination of factors (Paatero & Tapper, 1994). Several receptor models allow for quantitative PM source apportionment  
 16 (Viana et al., 2008), but PMF has been extensively used for this purpose (Reff et al., 2007; Hopke et al., 2020). Unlike Chemical  
 17 Mass Balance (CMB) model, PMF requires little prior knowledge of the factors involved. In contrast to Principal Component  
 18 Analysis (PCA), which imposes orthogonality of factors, PMF requires non-negativity, making it particularly suitable for  
 19 environmental and chemical components analysis. The bilinear factor analytic model is defined as:

$$20 \quad (S1) \quad x_{ij} = \sum_{k=1}^p g_{ik} \cdot f_{kj} + e_{ij}$$

21 Where  $x_{ij}$  is the measurement term,  $g_{ik}$  is the factor time series,  $f_{kj}$  is the factor profile, and  $e_{ij}$  is the model residual. The  
 22 indices  $i$ ,  $j$ ,  $k$ , and  $p$  correspond to the time elements, variables, factor numbers, and the total number of selected factors,  
 23 respectively.

24 To solve Equation (S1), the PMF solver fits the non-negative entries in  $g_{ik}$  and  $f_{kj}$  using a least squares algorithm to iteratively  
 25 minimise the objective function  $Q$ , defined as:

$$26 \quad (S2) \quad Q = \sum_i \sum_j \left( \frac{e_{ij}}{\sigma_{ij}} \right)^2$$

27 Where  $e_{ij}$  is the residual element and  $\sigma_{ij}$  is the measurement uncertainty for data point  $ij$ . Data points where  $e_{ij} \gg \sigma_{ij}$   
 28 contribute significantly to  $Q$  and may impact the modeling. To prevent the model from being destabilized by a few outliers  
 29 with high residuals and low uncertainties, the model is run in "robust" mode (Paatero, 1997), where outliers are defined as:

$$30 \quad (S3) \quad \left| \frac{e_{ij}}{\sigma_{ij}} \right| > \alpha$$

31 A value of  $\alpha = 4$  is recommended by Paatero (1997) for the "robust" mode. Outliers are then dynamically reweighted to reduce  
 32 the dependence of  $Q$  on the changes in outlier residuals. To examine the objective function  $Q$  across different PMF runs, the  
 33 ration  $Q/Q_{\text{exp}}$  is calculated where  $Q_{\text{exp}}$  represents the degree of freedom of the model solution, with:

$$34 \quad (S4) \quad Q_{\text{exp}} = n \cdot m - p \cdot (m + n)$$

35 Where  $n$  is the number of time points,  $m$  is the number of variables, and  $p$  is the number of factors used in the PMF run. The  
 36 ratio  $Q/Q_{\text{exp}}$  has been reported to have a high variability, ranging from values below 1 to over 30 in previous studies (Brown  
 37 et al., 2015; Belis et al., 2019; Canonaco et al., 2021; Manousakas et al., 2022; Via et al., 2022), depending on the instrument  
 38 used and on the measured and modeled uncertainties. While an ideal value of  $Q/Q_{\text{exp}}$  is close to 1, its absolute value cannot be  
 39 used as a sole metric for judging model results. Instead, one should assess the relative change in  $Q/Q_{\text{exp}}$  across different model  
 40 runs to select a reasonable model solution, for instance following the Elbow method. A significant decrease in  $Q/Q_{\text{exp}}$  typically  
 41 indicates improved data explanation, while minimal changes suggest that additional factors do not contribute meaningful  
 42 information, implying that a smaller  $p$  is sufficient.

43 Following the recommendations of Paatero and Hopke (2003), a step function should be applied to remove variables with a  
 44 signal-to-noise ratio (S2N) less than 0.2, classified as "bad" variables, and downweight those with S2N between 0.2 and 2,  
 45 classified as "weak" variables. However, this method downweights entire variables, potentially excluding data with low  
 46 average S2N but some high S2N data points. Therefore, data are downweighted cell-wise according to the method proposed  
 47 by Visser et al. (2015b): entries in  $x_{ij}$  with a signal-to-noise ratio below 2 are downweighted by replacing the corresponding  
 48  $\sigma_{ij}$  with  $\frac{2}{SNR_{ij}}$ .

49 Different solvers exist for PMF, namely PMF2 and the ME-2 solver. The ME-2 solver has the advantage of improved control  
 50 over rotational ambiguity, which occurs when multiple mathematically equivalent solutions exist for the same  $Q$  value  
 51 (Paatero, 1999; Paatero et al., 2002). With ME-2 solver, the user can add a priori information into the model (e.g., source  
 52 profiles), so that it does not rotate and it provides a rather unique solution (Paatero and Hopke, 2009). By incorporating a priori  
 53 information (e.g., fixed or constrained source profiles or time series), ME-2 can guide the model toward more interpretable  
 54 and environmentally reasonable solutions (Paatero and Hopke, 2009). One widely used technique to constrain the solution  
 55 space is the  $a$ -value approach, where selected factor profiles or factor times series are constrained using anchor values, and the  
 56 scalar  $a$  defines the extent to which the outputs  $f'_{kj}$  or  $g'_{ik}$  are allowed to vary during model iteration.

$$57 \quad (S5) \quad f_{kj} = f'_{kj} \pm a \cdot f_{kj}'$$

$$58 \quad (S6) \quad g_{ik} = g'_{ik} \pm a \cdot g_{ik}'$$

59 With the index  $j$  representing the variable and  $i$  the measured point in time for the  $k$ -th factor. Statistical uncertainties and  
60 rotational ambiguity of the PMF solutions were assessed using a bootstrap resampling approach (Efron, 1979; Ulbrich et al.,  
61 2009) and, for constrained solutions, by varying randomly the  $a$ -value. Bootstrap resampling technique consists of generating  
62 a number of new PMF input matrix, whose length are generally from a few days to 2 months, with randomly selected  
63 timepoints. If the bootstrapped PMF results remain consistent across these perturbed datasets, the solution is considered  
64 statistically robust. The variability observed among bootstrap runs within the same factor is then interpreted as the statistical  
65 uncertainty of that factor.

## 66 **S2: PD-SID**

67 The Pearson Distance (PD, Belis et al., 2015; Pernigotti et al., 2016; Pernigotti & Belis, 2018) is equal to  $1 - r^2$  where  $r^2$  is  
68 the Pearson coefficient. As  $PD$  is sensitive to outliers, in this study it is particularly influenced by elements that dominate the  
69 composition of each factor, i.e. the most abundant species such as S, K, Ca, or Fe.

70  $SID$  is defined by:

$$71 \quad SID = \frac{\sqrt{2}}{m} \sum_{j=1}^m \frac{|x_j - y_j|}{x_j + y_j}$$

72 with  $x_j$  and  $y_j$  the relative contribution of the specie  $j$  to the  $x$  and  $y$  factors, and  $m$  the number of common species in  $x$  and  
73  $y$ .  $PD < 0.4$  and  $SID < 1$  are considered as acceptable criteria for chemical homogeneous profiles.

## 74 **S3: Cosine Distance**

75 The Cosine Distance is equal to  $1 - cosine\ score$  where  $cosine\ score$  is defined by:

$$76 \quad cosine\ score = \cos(\theta) = \frac{x \cdot y}{\|x\| \cdot \|y\|}$$

77 Where  $x$  and  $y$  are 2 different factors (Stein & Scott, 1994). The  $cosine\ score$  is analogous to the Pearson correlation  
78 coefficient but has the advantage of being less sensitive to outliers. For this reason, it has previously been used to assess profile  
79 similarity in aerosol mass spectrometric data (Ulbrich et al., 2009).

## 80 **S4: PM<sub>1</sub> Mass Reconstruction at MRS-LCP**

81 Direct PM<sub>1</sub> mass concentrations obtained with the FIDAS 200 instrument are limited to particles larger than 180 nm. However,  
82 a significant fraction of fine particles, particularly those of anthropogenic origin from combustion processes, lies below 200  
83 nm (Manigrasso et al., 2022). To account for this limitation, PM<sub>1</sub> mass concentrations at MRS-LCP were reconstructed using  
84 two complementary methods: summing the mass contributions from PM<sub>1</sub> chemical species obtained through the ToF-ACSM

85 and Xact Rolling PMF, as well as deconvoluted  $BC_{SF}$  and  $BC_{LF}$  from AE33, and deriving  $PM_{10}$  mass from the submicronic  
86 particle size number distribution measured by the SMPS (15nm-723 nm size resolution), following the approach of Heutte et  
87 al. (2023) or using an average aerosol density of  $1.5 \text{ g cm}^{-3}$ . Reconstruction with specific particle densities yielded results  
88 nearly identical to those using the average density ( $R^2 = 0.99$ ,  $b = 0.97$ ; Figure S3a), and thus the specific particles density  
89 approach was adopted as the reference for  $PM_{10}$  mass from SMPS in subsequent analyses. Comparison between SMPS-derived  
90  $PM_{10}$  and FIDAS measurements indicated a slight underestimation by the latter ( $R^2 = 0.79$ ,  $b = 0.89$ ; Figure S3b). An even  
91 larger underestimation was observed when reconstructing  $PM_{10}$  mass from ToF-ACSM and Xact Rolling PMF results, and  
92  $BC_{SF}$  and  $BC_{LF}$  from AE33 ( $R^2 = 0.75$ ,  $b = 0.75$ ; Figure S3c). The latest indicates that SMPS-derived  $PM_{10}$  mass is more reliable,  
93 which is consistent with the higher collection efficiency of the SMPS for ultrafine particles ( $<100 \text{ nm}$ ). Consequently,  $PM_{10}$   
94 mass from SMPS was used for comparison with total elemental mass from Xact (Figure S4), showing that airborne elements  
95 accounted for  $\sim 8\%$  of  $PM_{10}$  mass on average. Notably, Xact elements contribute slightly more to  $PM_{10}$  mass during summer,  
96 reflecting increased sulfur levels.

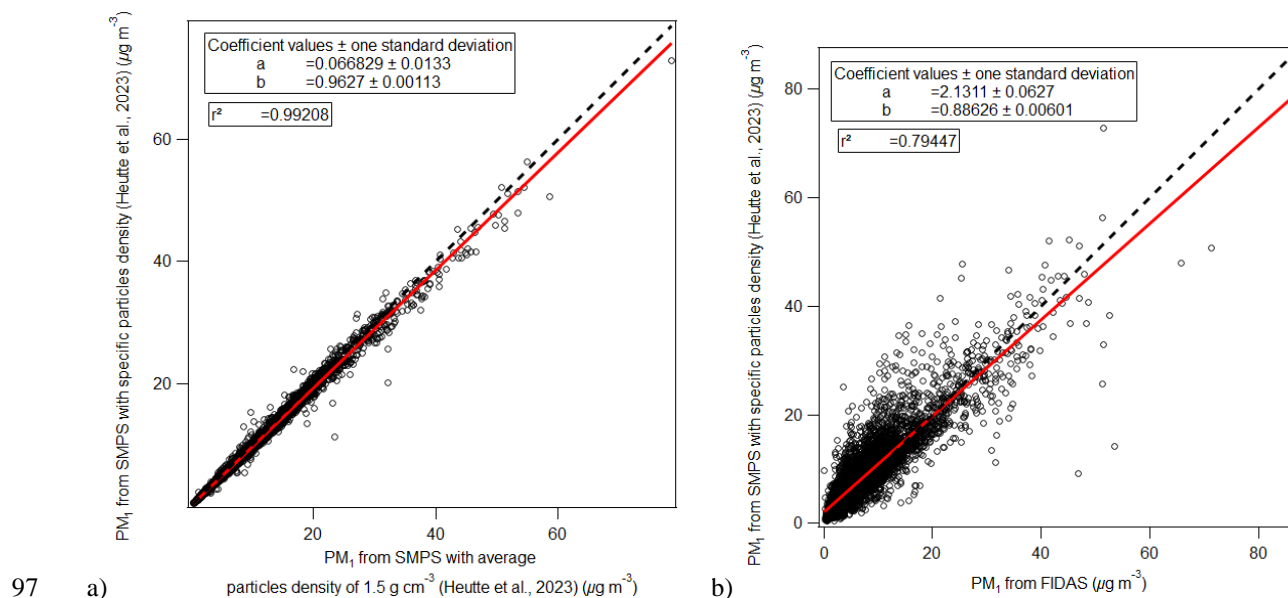

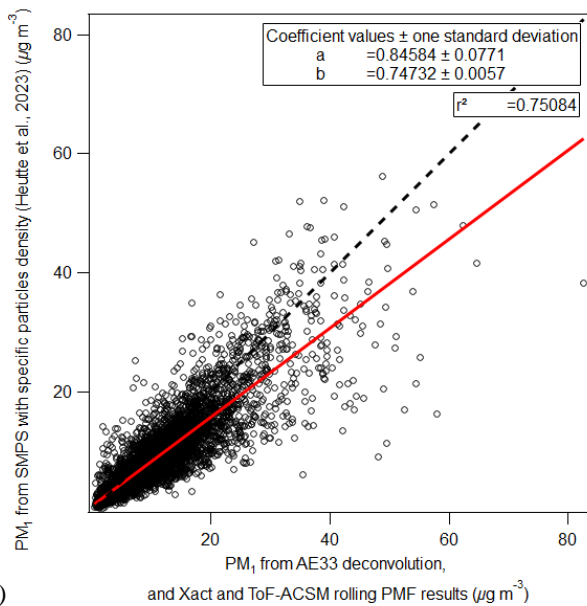

98

c)

99

100

101

**Figure S3: Linear correlation of the PM<sub>1</sub> concentration reconstructed from SMPS data with specific particles density (Heutte et al., 2023) versus a) PM<sub>1</sub> mass from SMPS with average particles density ( $1.5 \text{ g cm}^{-3}$ ), b) PM<sub>1</sub> from FIDAS, and c) PM<sub>1</sub> from ToF-ACSM and Xact Rolling PMF results, and BC<sub>sf</sub> and BC<sub>lf</sub> from AE33, at MRS-LCP.**

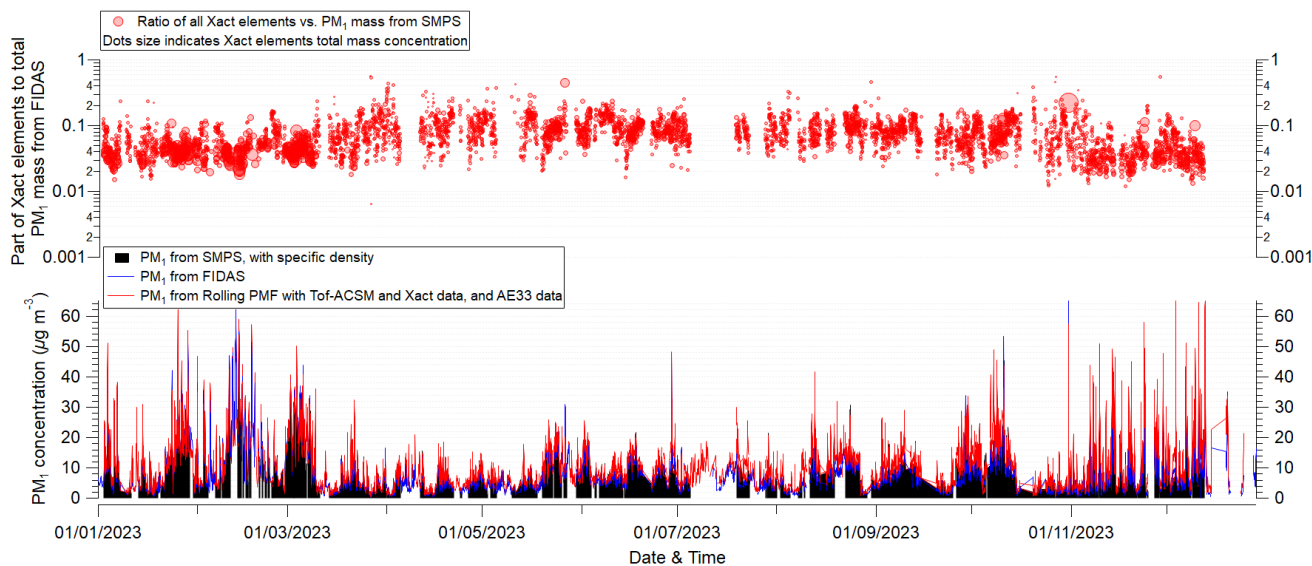

102

103

104

**Figure S4: PM<sub>1</sub> concentration derived from different methods explained above, and ratio of total elements from Xact versus PM<sub>1</sub> derived from SMPS, at MRS-LCP for 2023.**

105

106

| Metal | LOD ( $\text{ng m}^{-3}$ ) | BDL (%) |
|-------|----------------------------|---------|
|-------|----------------------------|---------|

|    |      |       |
|----|------|-------|
| K  | 2,00 | 0,01  |
| Zn | 0,12 | 0,01  |
| S  | 5,50 | 0,06  |
| Fe | 0,30 | 0,13  |
| Br | 0,18 | 2,82  |
| Ca | 0,52 | 9,53  |
| Cu | 0,14 | 11,84 |
| Pd | 3,80 | 19,15 |
| Ni | 0,17 | 26,20 |
| As | 0,11 | 39,74 |
| Ti | 0,28 | 44,17 |
| Cl | 3,00 | 54,19 |
| V  | 0,21 | 56,05 |
| Se | 0,14 | 77,54 |
| Pb | 0,22 | 82,29 |
| Mn | 0,25 | 90,83 |
| Cd | 4,40 | 92,67 |
| Cr | 0,20 | 94,63 |

107 **Table S2: Xact 625i Minimum Detection Limits (ng m<sup>-3</sup>) and percentage (%) of data Below Detection Limit (BDL) for each selected**  
108 **element at MRS-LCP**

109

| <b>Metal</b> | <b>LOD (ng m<sup>-3</sup>)</b> | <b>BDL (%)</b> |
|--------------|--------------------------------|----------------|
| Zn           | 0,12                           | 0,00           |
| S            | 5,50                           | 0,20           |
| Fe           | 0,30                           | 0,57           |
| K            | 2,00                           | 1,02           |
| Br           | 0,18                           | 4,55           |
| Ca           | 0,52                           | 10,87          |
| Cl           | 3,00                           | 29,28          |
| As           | 0,11                           | 30,43          |
| Cu           | 0,14                           | 44,54          |

|    |      |       |
|----|------|-------|
| Ti | 0,28 | 54,85 |
| V  | 0,21 | 64,27 |
| Cd | 4,40 | 68,93 |
| Ni | 0,17 | 71,10 |
| Pb | 0,22 | 72,88 |
| Se | 0,14 | 73,71 |
| Mn | 0,25 | 84,22 |
| Cr | 0,20 | 88,00 |
| Rb | 0,33 | 96,35 |

110 **Table S3: Xact 625i Minimum Detection Limits (ng m<sup>-3</sup>) and percentage (%) of data Below Detection Limit (BDL) for each selected**  
 111 **element at FOS**

112 **S5: Data correction**

113 Both MRS-LCP and FOS monitoring stations are occasionally influenced by sporadic events such as Saharan dust episodes  
 114 with Sirocco wind, local construction activities, and firework (e.g., National Day on July 14th, Carnival Day on May 6th, and  
 115 the *Olympique de Marseille* official football club 30th Anniversary Victory Celebration on May 26th). Fireworks can be readily  
 116 identified by the specific gunpowder tracer, Bi (Rai et al., 2020). However, due to variations in chemical composition  
 117 depending on firework colors, no distinct global firework factor could be resolved in the PMF analysis. Retaining these  
 118 elements would only produce occasional firework-related spikes across several PMF factors, including Biomass Burning  
 119 (4.2.2). Therefore, these occasional firework spikes, identified through unusual spikes in Bi as well as K, Cu and Cl, were  
 120 removed from the dataset.

121 Although Saharan dust is predominantly found in the coarse fraction, significant enrichment in the fine fraction for Si, Ti, Ca,  
 122 and Fe has been observed during Sirocco episodes. This fine-fraction enrichment can bias source apportionment analyses using  
 123 Non-Parametric Wind Regression (NWR), particularly for sources with similar elemental signatures at different locations (e.g.,  
 124 Ca from north-westerly Mistral dust versus south-easterly Saharan dust, or Fe from Steel Industry and Saharan dust; Sections  
 125 4.2.4 and 4.2.10). Saharan dust events were identified based on multiple criteria: AtmoSud air quality alerts, wind force and  
 126 direction, anomalies in daily average temperature relative to a 10-day moving average, elevated PM<sub>10</sub>/PM<sub>1</sub> ratios, and elevated  
 127 trace levels of Si, Ca, Fe, and Ti measured by the Xact instrument. Attempts were made to isolate a Saharan dust-related factor  
 128 using Positive Matrix Factorization (PMF) by including Si as a Saharan dust tracer. However, this approach proved  
 129 unsatisfactory as Si concentrations in the fine fraction were below detection limits 99% of the year (See Supplements Figures  
 130 S1 & S2), and the resulting Saharan dust-related PMF factor did not differ significantly in composition from the general Dust  
 131 factor. Owing to these limitations, Saharan dust-influenced periods were excluded from the dataset.

132 Building work events (3 events during the year), identified by high spikes of Ca, Fe, Ti and Si during working hours, 8 a.m. to  
133 6 p.m. on working days, have also been removed.

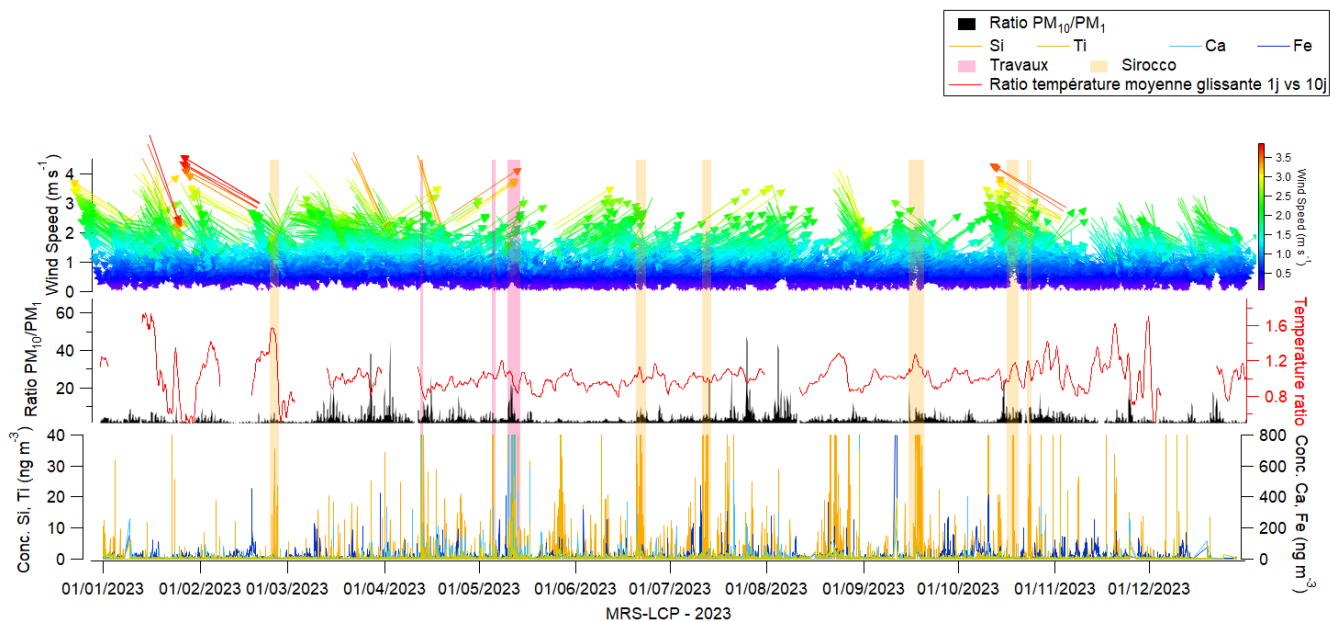

134  
135 **Figure S5: Identification of different dust events during 2023 at MRS-LCP through analysis of wind speed and direction,**  
136 **temperature, PM<sub>10</sub>/PM<sub>1</sub> ratio, and specific airborne elements concentration.**

137

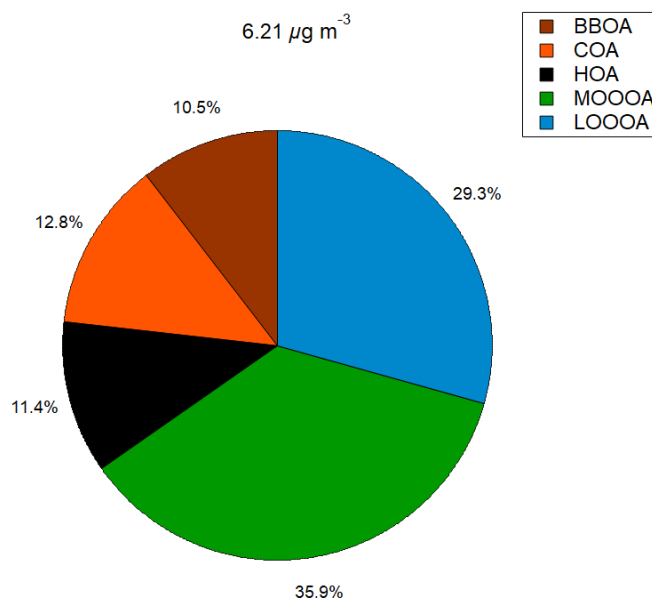

138

139 **Figure S6: Pie chart showing the mass contribution of Rolling ToF-ACSM PMF factors, for MRS-LCP (2023).**

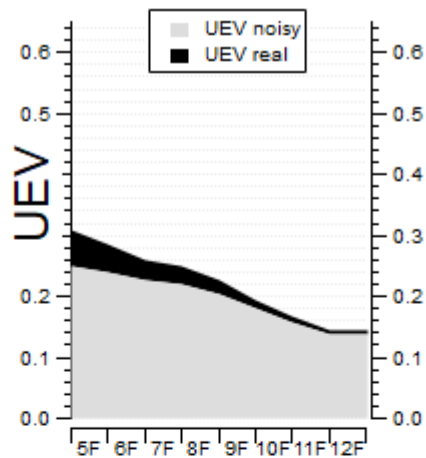

FOS

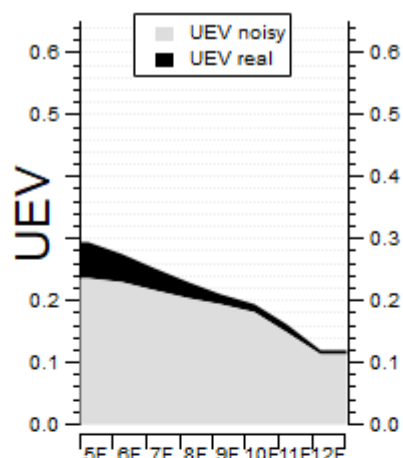

MRS-LCP

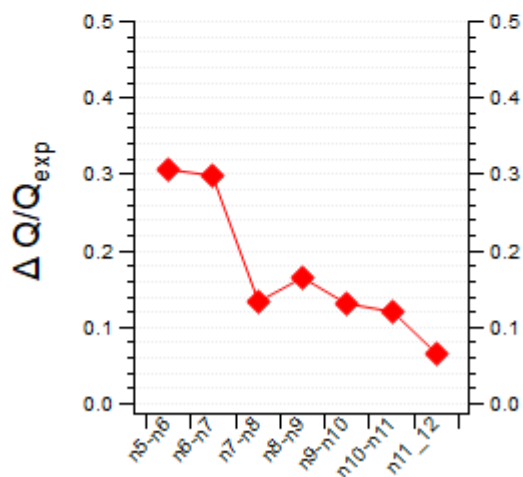

FOS

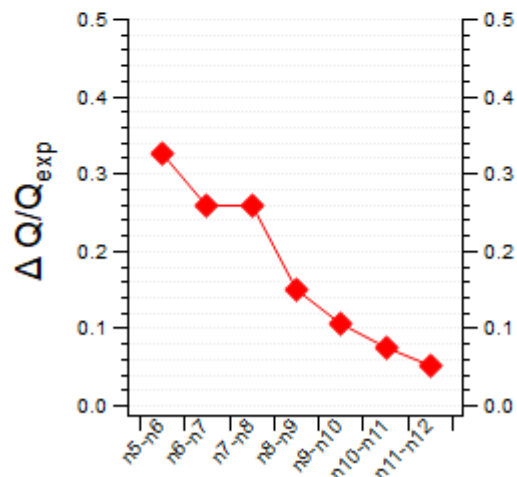

MRS-LCP

140

141

142

Figure S7: UEV (top) and  $\Delta Q/Q_{exp}$  (bottom) for unconstrained PMF solutions ranging from 5 to 12 factors, at MRS-LCP (left) and FOS (right). The solutions were repeated 5 times, and the means are displayed in the graphs.

143

144

|                                 | <b>Composition</b>    | <b>Seasonality</b>                    | <b>Daily Cycles</b>                      | <b>Geographical origin</b>    | <b>Correlation with external data</b> | <b>Mixing with other factors</b>               | <b>Previous observations of similar factors in the literature</b> |
|---------------------------------|-----------------------|---------------------------------------|------------------------------------------|-------------------------------|---------------------------------------|------------------------------------------------|-------------------------------------------------------------------|
| <b>Shipping</b>                 | S with tracers V & Ni | Mostly during summer with sea breezes | Spikes in the morning and in the evening | Sea (S-W MRS-LCP & S-S-E FOS) | -                                     | Mixed with S-rich (S, Se) below 8 factors      | Camman et al., 2024, Fossum et al., 2024                          |
| <b>Br-rich</b>                  | Br                    | -                                     | -                                        | -                             | -                                     | -                                              | Camman et al., 2024                                               |
| <b>Zn-rich (MRS-LCP only)</b>   | Mainly Zn, Pb traces  | -                                     | -                                        | -                             | -                                     | -                                              | -                                                                 |
| <b>Zn-Industrial (FOS only)</b> | Mainly Zn, Mn traces  | -                                     | -                                        | -                             | -                                     | -                                              | -                                                                 |
| <b>Cl-rich</b>                  | Cl mainly             | Mostly during winter                  | Similar to Biomass Burning diurnal cycle | -                             | -                                     | Mixed with Biomass Burning (K) below 7 factors | Visser et al., 2015b                                              |
| <b>Dust</b>                     | Ca & Ti association   | -                                     | Elevated activity during the day         | -                             | -                                     | -                                              | Manousakas et al., 2022                                           |
| <b>Steel Industry</b>           | Mn & Fe association   | -                                     | Elevated activity during the day         | -                             | -                                     | -                                              | -                                                                 |

|                                 |                      |                             |                                  |                                                                                        |                                                                                    |                                             |                         |
|---------------------------------|----------------------|-----------------------------|----------------------------------|----------------------------------------------------------------------------------------|------------------------------------------------------------------------------------|---------------------------------------------|-------------------------|
| <b>Biomass Burning</b>          | Major K contribution | Mostly during winter        | Biomass Burning typical cycle    | N-E with land breeze, relatively low wind speed                                        | BBOA (ToF-ACSM, MRS-LCP only), BC <sub>SF</sub> (AE33), Benzene (VOC72M, FOS only) | Mixed with Cl-rich (Cl) below 7 factors     | Manousakas et al., 2022 |
| <b>S-rich</b>                   | S & Se association   | Less activity during winter | Flat with slight peak at mid-day | Mainly the sea (S-W MRS-LCP & S-S-E FOS)                                               | SO <sub>4</sub> <sup>2-</sup> (ToF-ACSM, MRS-LCP only)                             | Mixed with Shipping (V, Ni) below 8 factors | Manousakas et al., 2022 |
| <b>Pb-Industrial (FOS only)</b> | S, K, tracers as Pb  | -                           | -                                | Distinct geographical origin from both Fos-sur-Mer and Port-de-Bouc industrial complex | -                                                                                  | Below 9 factors, mixed with Biomass Burning | -                       |

145 **Table S4: Table of geochemical criteria for factors identification into preliminary PMF tests, at MRS-LCP and FOS.**

146

147

| Factor          | YEAR | JF_D | MAM  | JJA  | SON  |
|-----------------|------|------|------|------|------|
| Shipping        | 80%  | 0%   | 100% | 100% | 70%  |
| Br-rich         | 80%  | 100% | 90%  | 60%  | 60%  |
| Zn-rich         | 80%  | 30%  | 70%  | 70%  | 80%  |
| Cl-rich         | 80%  | 30%  | 70%  | 0%   | 80%  |
| Dust            | 80%  | 100% | 70%  | 0%   | 100% |
| Steel Industry  | 80%  | 100% | 50%  | 60%  | 100% |
| Biomass Burning | 80%  | 100% | 70%  | 100% | 80%  |
| S-rich          | 80%  | 0%   | 100% | 100% | 70%  |

|                                               |     |      |     |      |     |
|-----------------------------------------------|-----|------|-----|------|-----|
| Percentage of selected runs among the 10 runs | 80% | 100% | 70% | 100% | 80% |
|-----------------------------------------------|-----|------|-----|------|-----|

148 Table S5: Results of the preliminary PMF runs at MRS-LCP, showing the percentage of each factor retrieved across five different  
 149 time periods (YEAR, JF\_D, MAM, JJA, SON). Each PMF run was unconstrained, with 10 repeats and 8 factors. Reasonable PMF  
 150 solutions were analysed through Q/Q<sub>exp</sub> variations. Red-bordered cells indicate the optimal period for the corresponding factor  
 151 observation.

152

| Factor                                        | YEAR | JF_D | MAM  | JJA  | SON  |
|-----------------------------------------------|------|------|------|------|------|
| Shipping                                      | 60%  | 0%   | 70%  | 100% | 50%  |
| Br-rich                                       | 100% | 100% | 70%  | 60%  | 100% |
| Zn Industrial                                 | 100% | 100% | 100% | 60%  | 100% |
| Pb-Industrial                                 | 100% | 100% | 100% | 100% | 100% |
| Cl-rich                                       | 100% | 100% | 100% | 60%  | 100% |
| Dust                                          | 100% | 100% | 100% | 60%  | 100% |
| Steel Industry                                | 100% | 100% | 100% | 60%  | 90%  |
| Biomass Burning                               | 100% | 100% | 100% | 100% | 100% |
| S-rich                                        | 60%  | 0%   | 100% | 100% | 100% |
| Percentage of selected runs among the 10 runs | 100% | 100% | 90%  | 60%  | 100% |

153 Table S6: Results of the preliminary PMF runs at FOS, showing the percentage of each factor retrieved across five different  
 154 time periods (YEAR, JF\_D, MAM, JJA, SON). Each PMF run was unconstrained, with 10 repeats and 8 factors. Reasonable PMF  
 155 solutions were analysed through Q/Q<sub>exp</sub> variations. Red-bordered cells indicate the optimal period for the corresponding factor  
 156 observation.

157

158

| MRS-LCP  |                   |           |                                           |                           |                      |                                     |  |
|----------|-------------------|-----------|-------------------------------------------|---------------------------|----------------------|-------------------------------------|--|
| Factor   | Criteria position | Constrain | Criterion                                 | SoFi Criterion traduction | Static PMF Threshold | Rolling PMF Threshold               |  |
| Shipping | 0                 | X         | Proportion of V apportioned to the factor | factor_1[V] / sum_[V]     | from 0,66 to 0,92    | Score > score of 2nd highest factor |  |

|                 |   |   |                                            |                                                 |                   |                                    |
|-----------------|---|---|--------------------------------------------|-------------------------------------------------|-------------------|------------------------------------|
| Br-related      | 1 |   | Proportion of Br apportioned to the factor | $\frac{\text{factor\_2[Br]}}{\text{sum\_}[Br]}$ | from 0,67 to 0,81 | Additional threshold from 0,3 to 1 |
| Zn-industrial   | 2 |   | Proportion of Zn apportioned to the factor | $\frac{\text{factor\_3[Zn]}}{\text{sum\_}[Zn]}$ | from 0,59 to 0,72 |                                    |
| Cl-rich         | 3 | X | Proportion of Cl apportioned to the factor | $\frac{\text{factor\_4[Cl]}}{\text{sum\_}[Cl]}$ | from 0,61 to 0,75 |                                    |
| Dust            | 4 |   | Proportion of Ca apportioned to the factor | $\frac{\text{factor\_5[Ca]}}{\text{sum\_}[Ca]}$ | from 0,8 to 0,87  |                                    |
| Steel Industry  | 5 |   | Proportion of Fe apportioned to the factor | $\frac{\text{factor\_6[Fe]}}{\text{sum\_}[Fe]}$ | from 0,68 to 0,77 |                                    |
| Biomass Burning | 6 |   | Proportion of K apportioned to the factor  | $\frac{\text{factor\_7[K]}}{\text{sum\_}[K]}$   | from 0,54 to 0,69 |                                    |
| Sulfates-rich   | 7 |   | Proportion of S apportioned to the factor  | $\frac{\text{factor\_8[S]}}{\text{sum\_}[S]}$   | from 0,74 to 0,84 |                                    |

**FOS**

| Factor   | Criteria position | Constrain | Criterion                                  | SoFi Criterion traduction                       | Static PMF Threshold Minimal proportion of tracer | Rolling PMF Threshold               |
|----------|-------------------|-----------|--------------------------------------------|-------------------------------------------------|---------------------------------------------------|-------------------------------------|
| Shipping | 0                 | X         | Proportion of V apportioned to the factor  | $\frac{\text{factor\_1[V]}}{\text{sum\_}[V]}$   | from 0,68 to 0,86                                 | Score > score of 2nd highest factor |
| Pb-rich  | 1                 |           | Proportion of Pb apportioned to the factor | $\frac{\text{factor\_9[Pb]}}{\text{sum\_}[Pb]}$ | from 0,59 to 0,82                                 | Additional threshold from 0,3 to 1  |

|                 |   |   |                                            |                                                            |                   |
|-----------------|---|---|--------------------------------------------|------------------------------------------------------------|-------------------|
| Br-related      | 2 |   | Proportion of Br apportioned to the factor | $\frac{\text{factor}_2[\text{Br}]}{\text{sum}[\text{Br}]}$ | from 0,52 to 0,7  |
| Zn-industrial   | 3 |   | Proportion of Zn apportioned to the factor | $\frac{\text{factor}_3[\text{Zn}]}{\text{sum}[\text{Zn}]}$ | from 0,57 to 0,73 |
| Cl-rich         | 4 | X | Proportion of Cl apportioned to the factor | $\frac{\text{factor}_4[\text{Cl}]}{\text{sum}[\text{Cl}]}$ | from 0,74 to 0,85 |
| Dust            | 5 |   | Proportion of Ca apportioned to the factor | $\frac{\text{factor}_5[\text{Ca}]}{\text{sum}[\text{Ca}]}$ | from 0,81 to 0,87 |
| Steel Industry  | 6 |   | Proportion of Fe apportioned to the factor | $\frac{\text{factor}_6[\text{Fe}]}{\text{sum}[\text{Fe}]}$ | from 0,63 to 0,74 |
| Biomass Burning | 7 |   | Proportion of K apportioned to the factor  | $\frac{\text{factor}_7[\text{K}]}{\text{sum}[\text{K}]}$   | from 0,62 to 0,75 |
| Sulfates-rich   | 8 |   | Proportion of S apportioned to the factor  | $\frac{\text{factor}_8[\text{S}]}{\text{sum}[\text{S}]}$   | from 0,63 to 0,82 |

159 **Table S7: SoFi criteria used for sorting and selecting PMF runs at MRS-LCP (top) and FOS (bottom), expressed as the percentage**  
160 **of each major tracer element apportioned to the corresponding factor. All criteria are applied as active selection parameters, except**  
161 **for constrained factors (Shipping and Cl-rich), which are treated as passive criteria. The last two columns indicate the applied**  
162 **thresholds for factor selection in static PMF runs (YEAR, JF\_D, MAM, JJA, SON) and Rolling PMF runs, respectively.**

163 The ordering of the criteria was also important, when multiple factors shared the same elements (e.g., sulfur), necessitating  
164 prioritisation from the least abundant to the most abundant tracers. A critical step in selecting valid bootstrapped PMF runs  
165 was setting a minimum score threshold for each criterion. For each factor, the score distribution was analyzed to identify  
166 criterion score slope break points and determine suitable thresholds. All thresholds exceeded 0.5 at least, meaning that in every  
167 accepted case, the tracer element was apportioned to at least 50% in the corresponding factor. The percentage of retained  
168 bootstrapped PMF runs for each period and site is presented in Supplements, Table S8, reflecting the robustness and  
169 consistency of the seasonal PMF solutions.

170

|  |            |                |
|--|------------|----------------|
|  | <b>FOS</b> | <b>MRS-LCP</b> |
|--|------------|----------------|

|             |      |      |
|-------------|------|------|
| <b>YEAR</b> | 49%  | 80%  |
| <b>JF_D</b> | 100% | 97%  |
| <b>MAM</b>  | 46%  | 83%  |
| <b>JJA</b>  | 47%  | 100% |
| <b>SON</b>  | 28%  | 44%  |

171 **Table S8: Percentage (%) of retained bootstrapped PMF runs for each period at both monitoring sites. Note that seasonal factors**  
 172 **were constrained only during JJA and JF\_D periods. Therefore, the percentages of retained bootstrapped PMF runs fall below 50%**  
 173 **only for unconstrained PMF solutions.**

174  
175

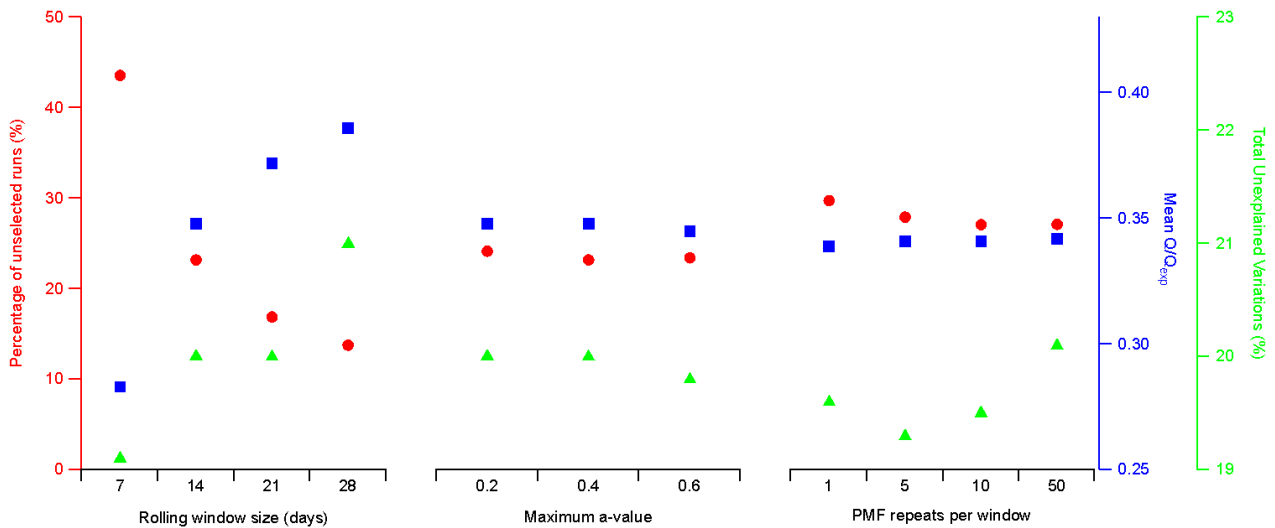

176  
177 **Figure S8: Statistical analysis of different rolling PMF parameters, based upon methodology developed by Canonaco et al. (2021).**  
 178 **Statistical metrics, ie. % of selected runs (left axis, red circles), mean  $Q/Q_{exp}$  (right axis, blue squares), and total unexplained**  
 179 **variations (right axis, green triangles) over the entire dataset are reported as a function of the rolling window size (left), maximum**  
 180 **a value with random a-value from 0 to a-value max in 0.5 (middle), and number of PMF repeats per window (right). In each plot,**  
 181 **two of these three parameters are fixed at their optimum values and the third is varied to account for statistical variations across**  
 182 **Rolling PMF runs. Optimum values are: rolling window size = 21 days, a-value max = 0,4 and PMF repeats per window = 50. PMF**  
 183 **runs with varying number of PMF repeats per window (right) are bootstrapped.**

184  
185

| PMF repeats per windows | Average amount of repeats | Minimal amount of repeats | Maximal amount of repeats |
|-------------------------|---------------------------|---------------------------|---------------------------|
| 1                       | 7                         | 0                         | 14                        |

|    |     |    |     |
|----|-----|----|-----|
| 5  | 33  | 3  | 60  |
| 10 | 68  | 8  | 114 |
| 50 | 337 | 49 | 505 |

**Table S9: Number of PMF repeats per modeled day for different configurations of PMF repeats per window. Each Rolling PMF analysis was performed with a maximum a-value of 0.4, incremented in 0.05 steps. The rolling window size was set to 14 days with a 1-day shift.**

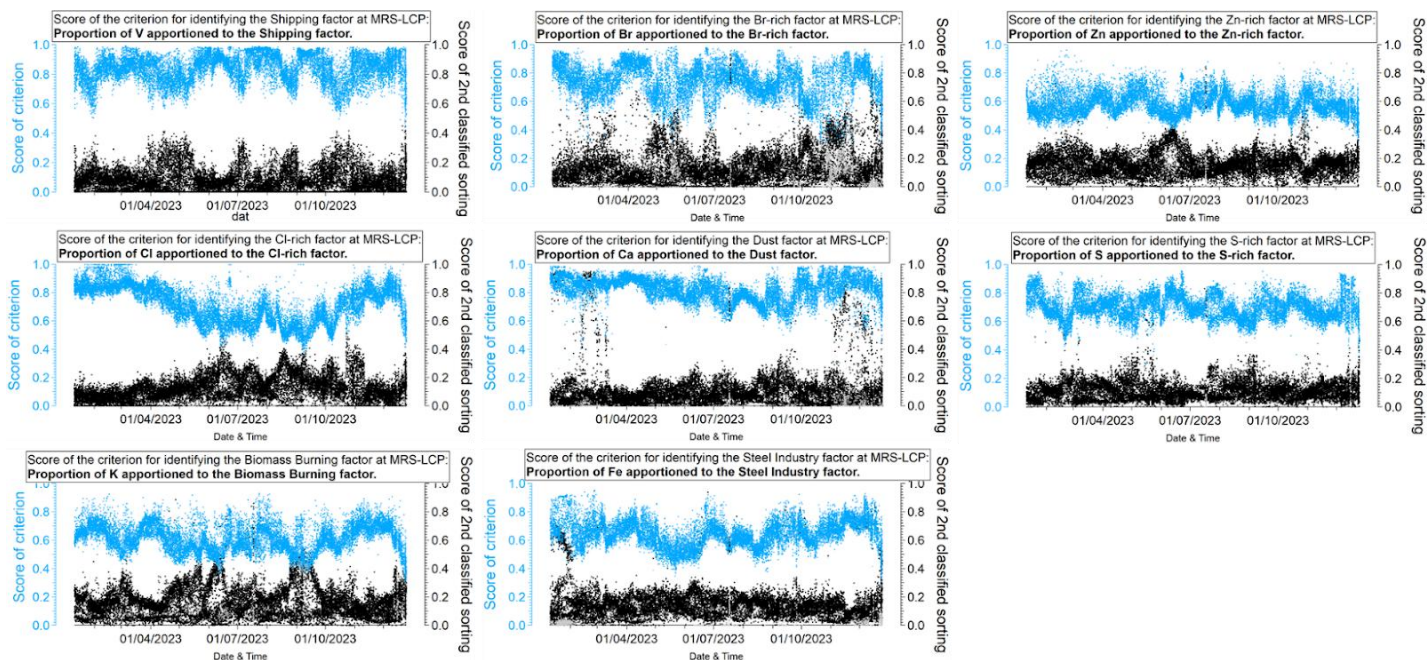

**Figure S9: Rolling PMF criteria scores for the 8 PMF factors identified in MRS-LCP. Blue dots represent PMF solutions that meet the selection criteria and are included in the final PMF average. Grey dots indicate PMF runs with unsatisfactory criteria scores (i.e., lower than 0.3 or lower than the second-highest scoring factor within the same PMF solution). Black dots mark the second-highest scoring factors in each PMF solution.**

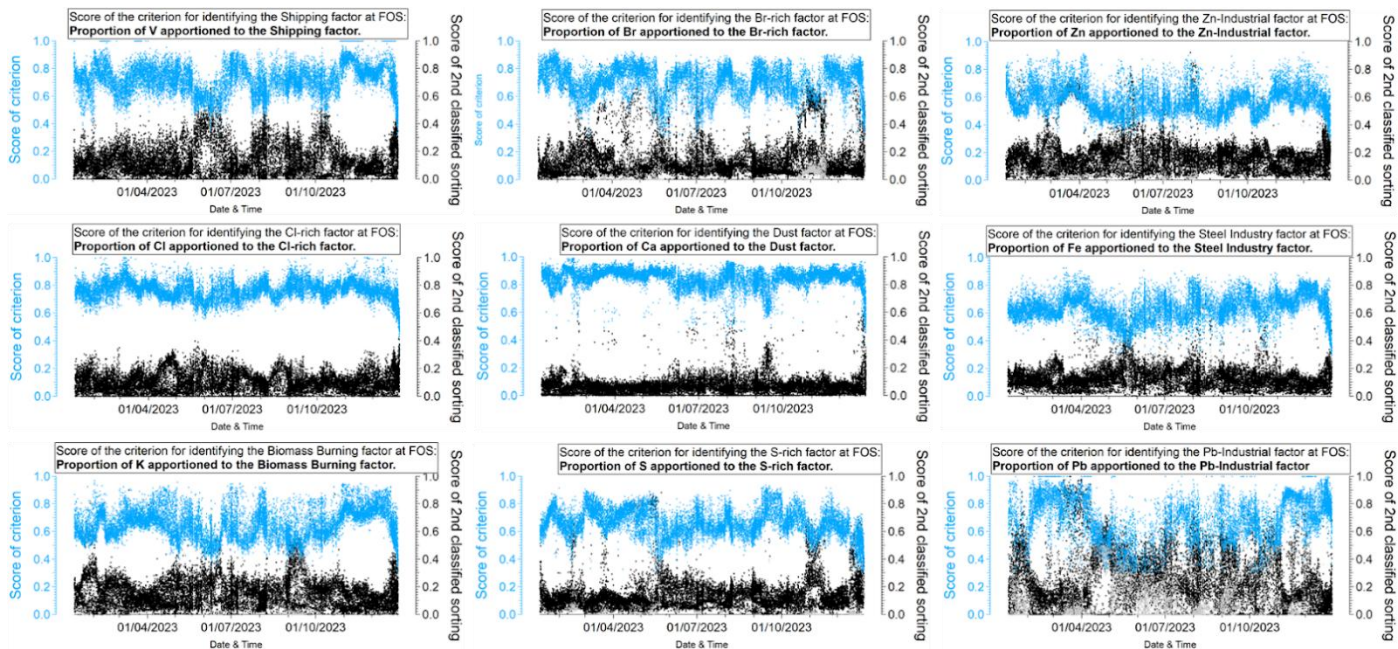

195

196

197

198

199

**Figure S10: Rolling PMF criteria scores for the 9 PMF factors identified in FOS. Blue dots represent PMF solutions that meet the selection criteria and are included in the final PMF average. Grey dots indicate PMF runs with unsatisfactory criteria scores (i.e., lower than 0.3 or lower than the second-highest scoring factor within the same PMF solution). Black dots mark the second-highest scoring factors in each PMF solution.**

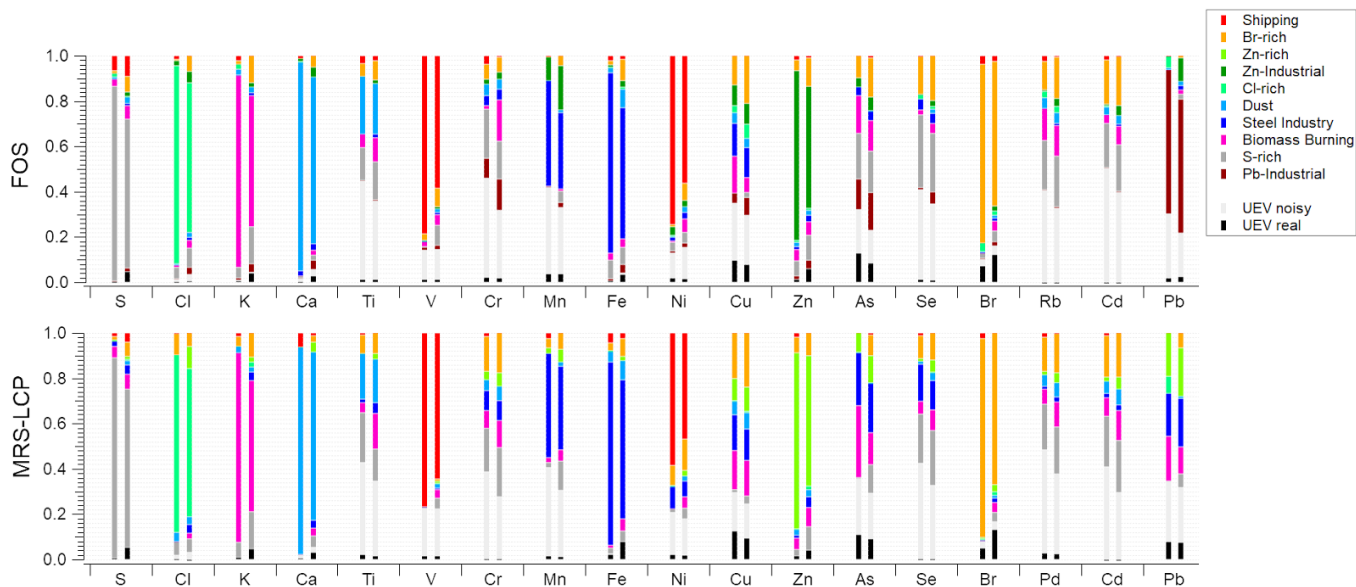

200

201

202

**Figure S11: Explained variation for each element, for static (YEAR) PMF solution (left bars) and Rolling PMF solution (right bars), at FOS (top) and MRS-LCP (bottom).**

S apportionment in static PMF factors at FOS

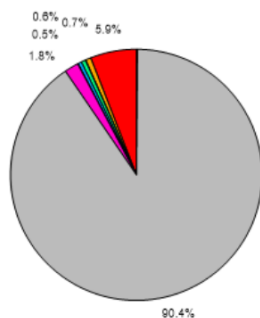

S apportionment in static PMF factors at MRS-LCP

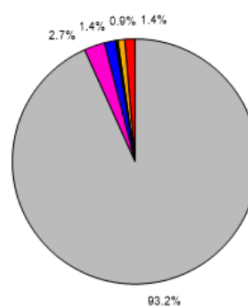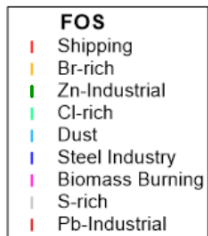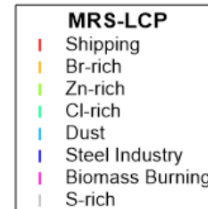

S apportionment in rolling PMF factors at FOS

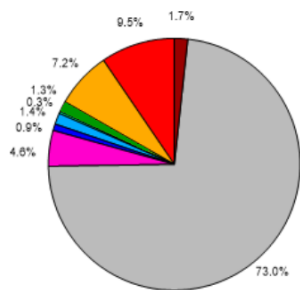

S apportionment in Rolling PMF factors at MRS-LCP

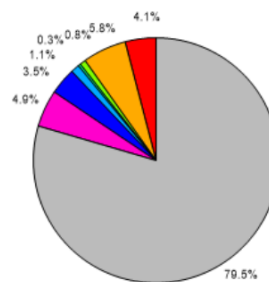

203

204

**Figure S12: S apportionment in static PMF factors (top) at FOS (left) and MRS-LCP (right) versus in rolling PMF factors (bottom).**

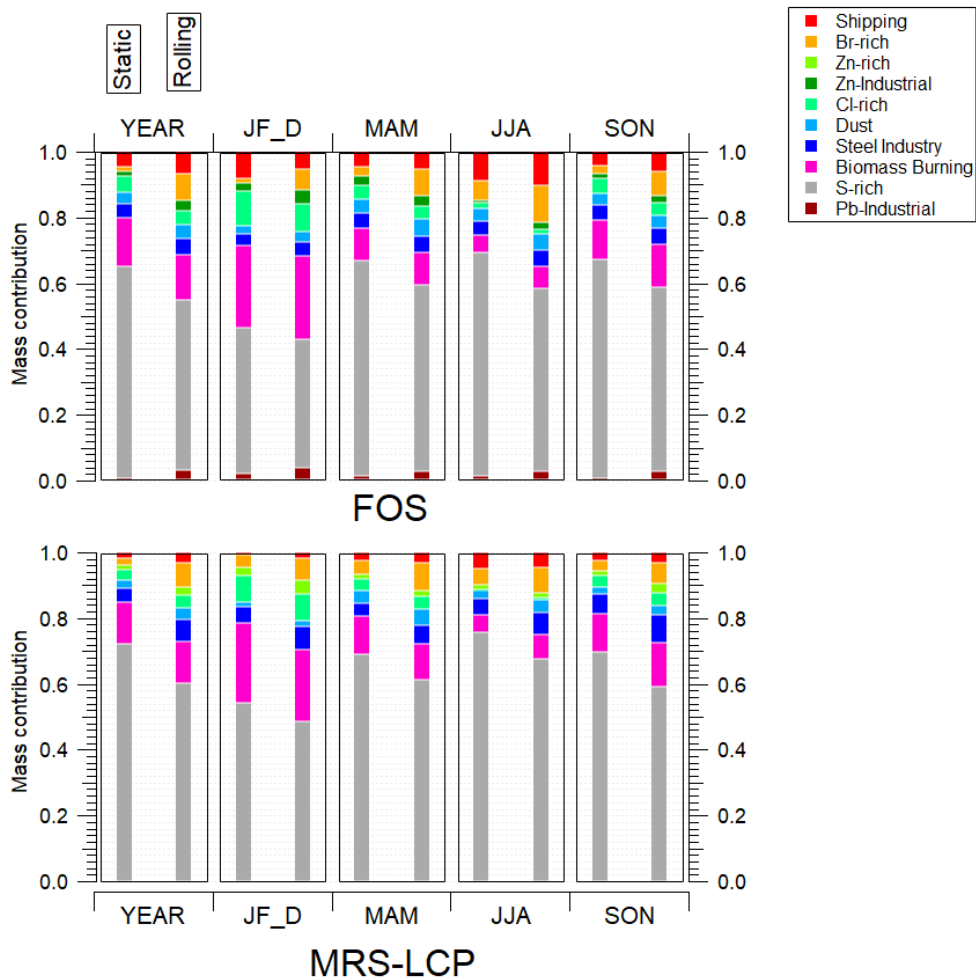

205

206 **Figure S13: Factor mass contributions obtained using static (left bars) and rolling (right bars) PMF approaches, for FOS (top) and**

207 **MRS-LCP (bottom), across different periods (bottom axis).**

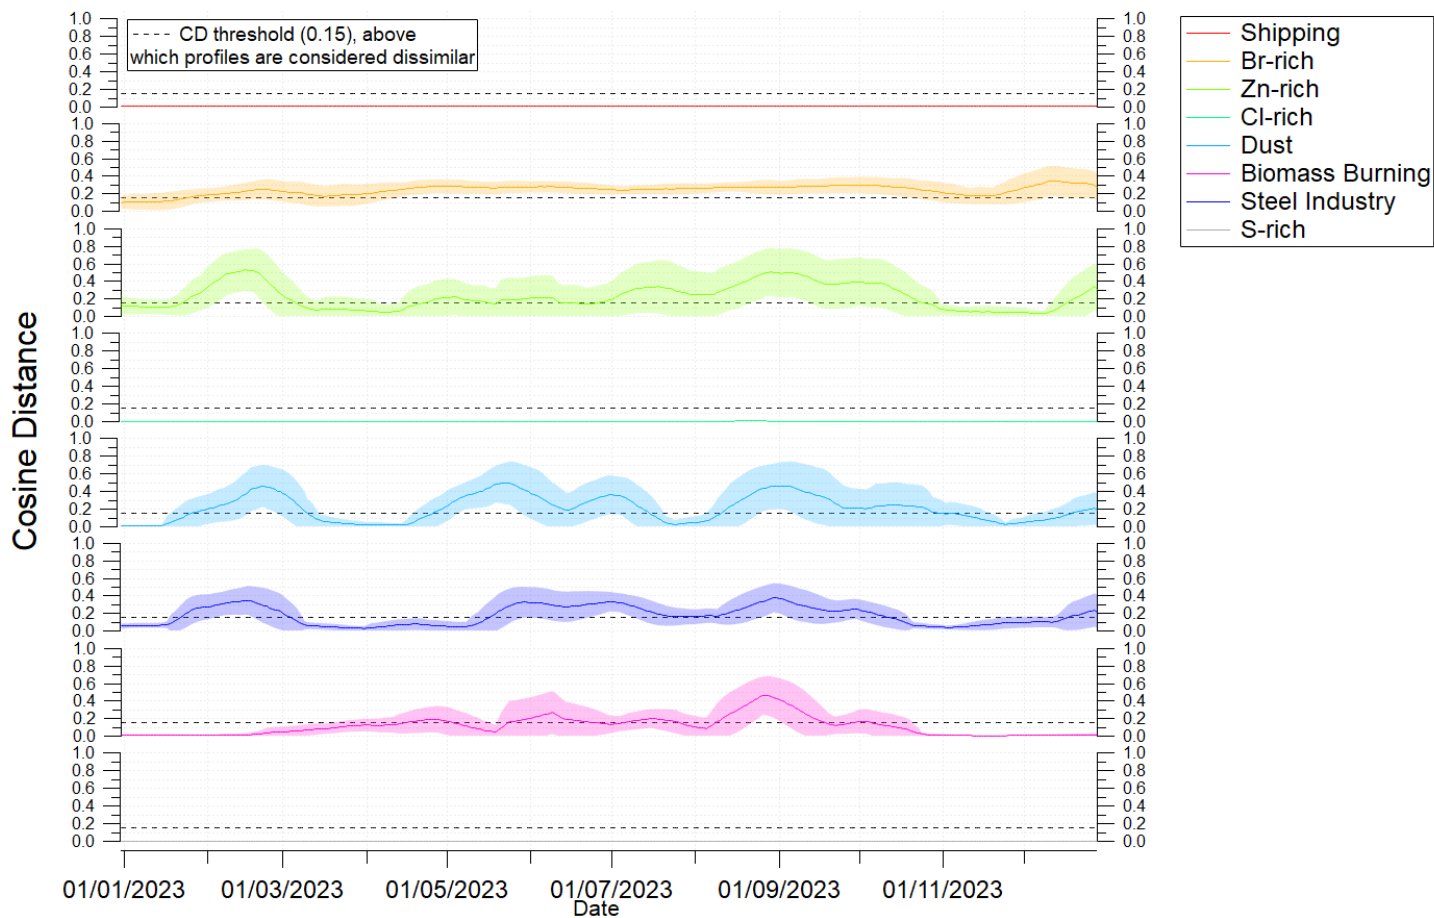

208

209

210

**Figure S14: CD of the static (YEAR) vs. daily rolling factors for the PMF factors at MRS-LCP. Dashed lines represent threshold of dissimilarity across factors (0.15, Bougiatioti et al., 2014)**

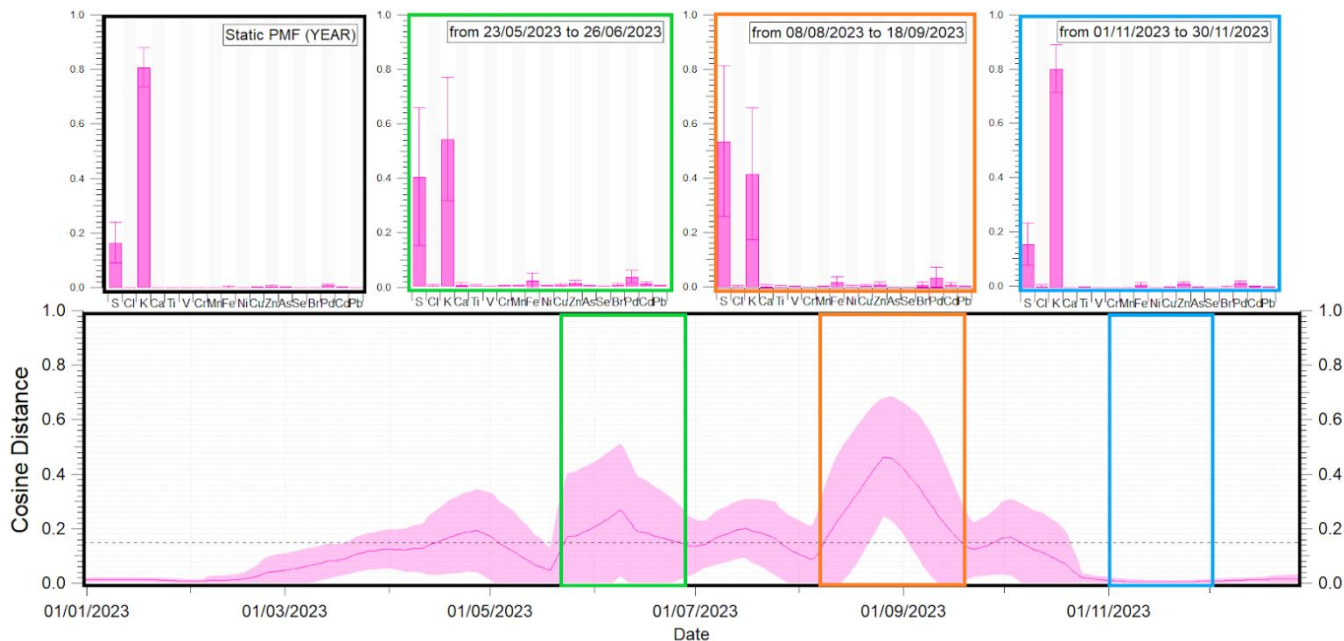

211

212 **Figure S15: CD of the static (YEAR) vs. daily rolling factors and factor profiles associated to specific time of the year, for the Biomass**  
 213 **Burning factor, at MRS-LCP. Dashed line represents threshold of dissimilarity across factors (0.15, Bougiatioti et al., 2014).**

214

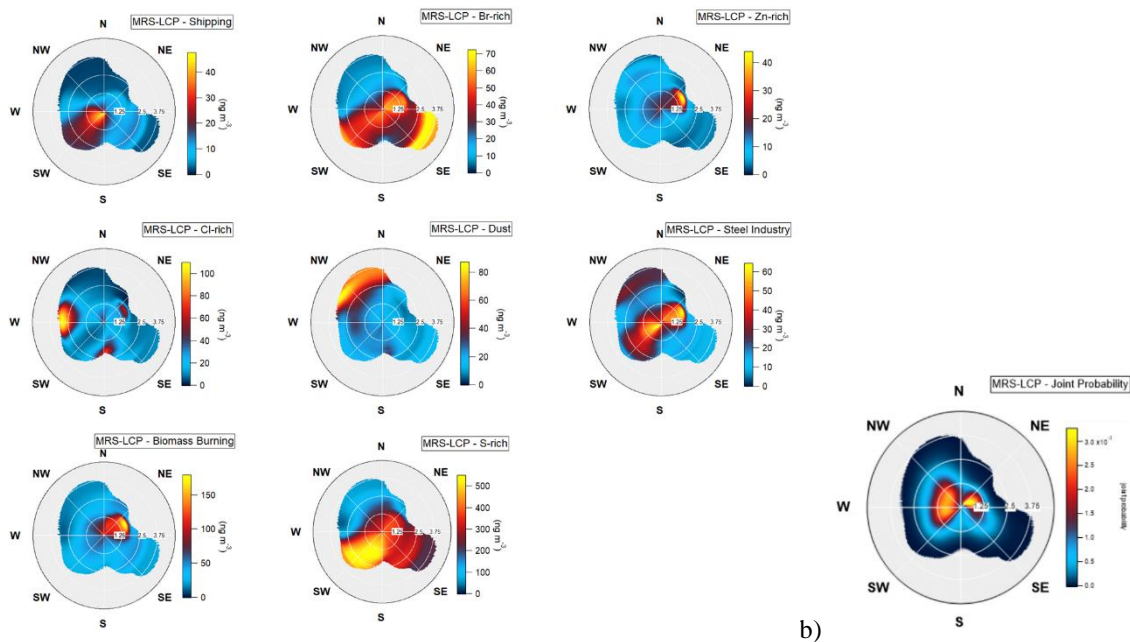

215

216 **Figure S16: a) Non-Parametric Wind Regression (NWR) showing the weighted average directional origin and associated**  
 217 **concentrations for the 8 factors identified at MRS-LCP. NWR wind roses were calculated using the final Rolling PMF results (21-**  
 218 **day window size, maximum a-value of 0.4, and 50 PMF repeats per window, with bootstrap enabled) over the entire measurement**

219 campaign year. Colors indicate factor concentrations for each wind direction, while the radial axis represents wind speed for the  
 220 corresponding concentrations. b) Wind Joint Probability at MRS-LCP. The radial axis represents wind speed for each occurring  
 221 wind direction, while colors indicate the prevalence of the corresponding wind direction and speed.

222  
 223

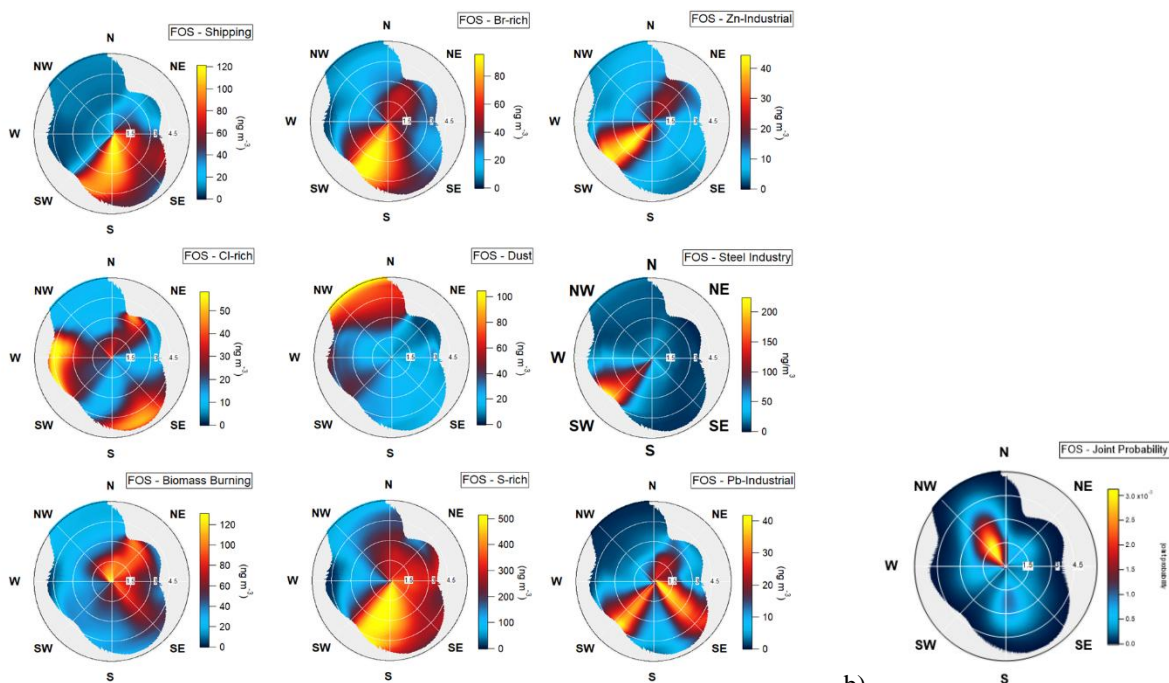

224 a)  
 225 **Figure S17: a) Non-Parametric Wind Regression (NWR) showing the weighted average directional origin and associated**  
 226 **concentrations for the 9 factors identified at FOS. NWR wind roses were calculated using the final Rolling PMF results (21-day**  
 227 **window size, maximum a-value of 0.4, and 50 PMF repeats per window, with bootstrap enabled) over the entire measurement**  
 228 **campaign year. Colors indicate factor concentrations for each wind direction, while the radial axis represents wind speed for the**  
 229 **corresponding concentrations. b) Wind Joint Probability at MRS-LCP. The radial axis represents wind speed for each occurring**  
 230 **wind direction, while colors indicate the prevalence of the corresponding wind direction and speed.**

### Weekly Diurnal Patterns

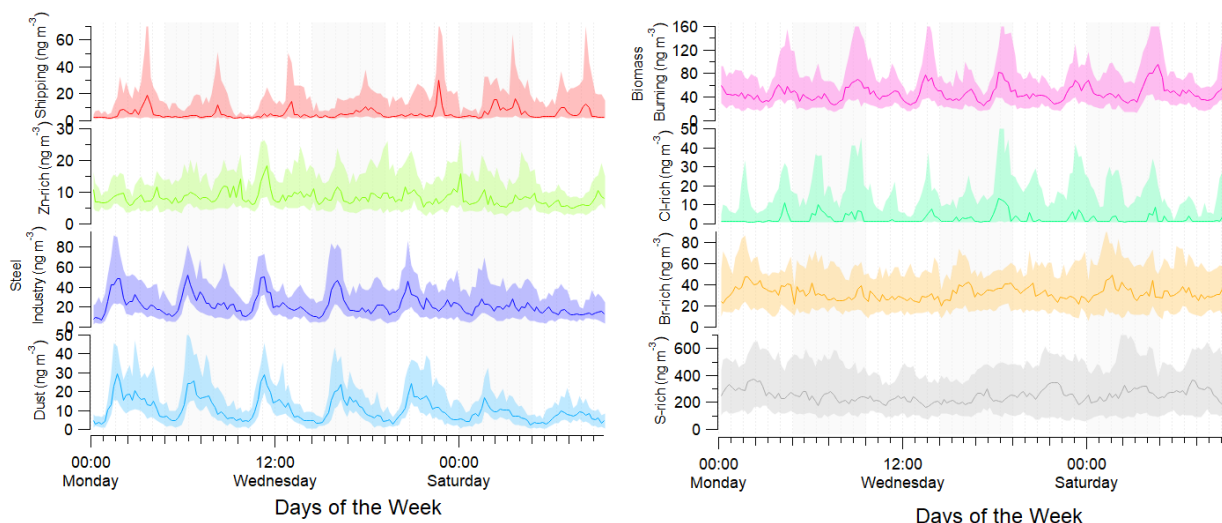

231

232

233

**Figure S18: Weekly diurnal patterns of the rolling PMF factors at MRS-LCP. The colored lines represent the median diurnal evolution of each factor, and the light-colored areas show the interquartile range.**

234

### Weekly Diurnal Patterns

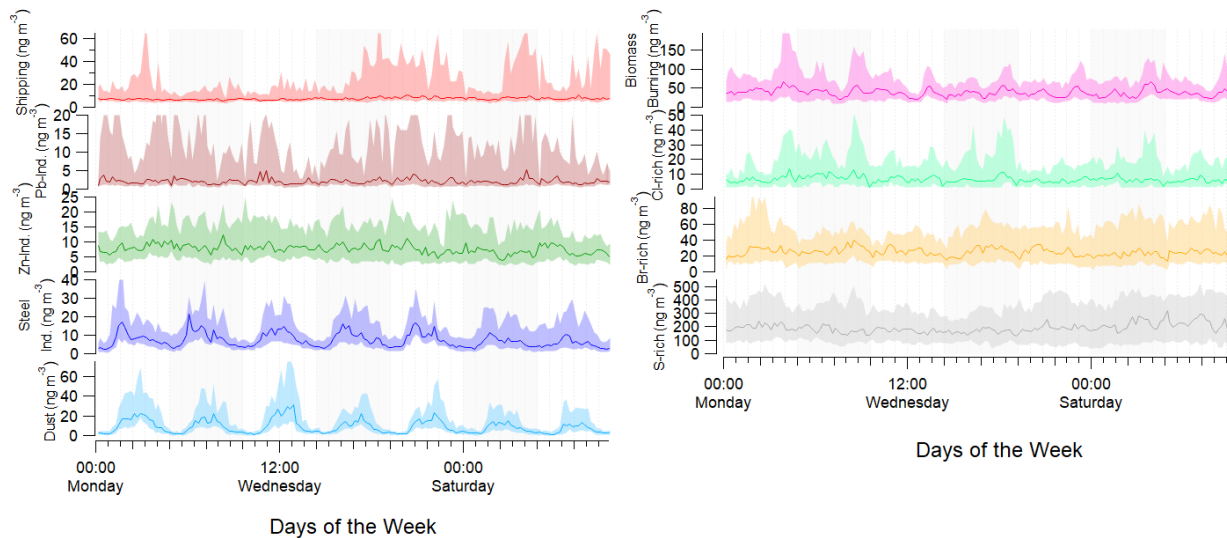

235

236

237

**Figure S19: Weekly diurnal patterns of the rolling PMF factors at FOS. The colored lines represent the median diurnal evolution of each factor, and the light-colored areas show the interquartile range.**

238

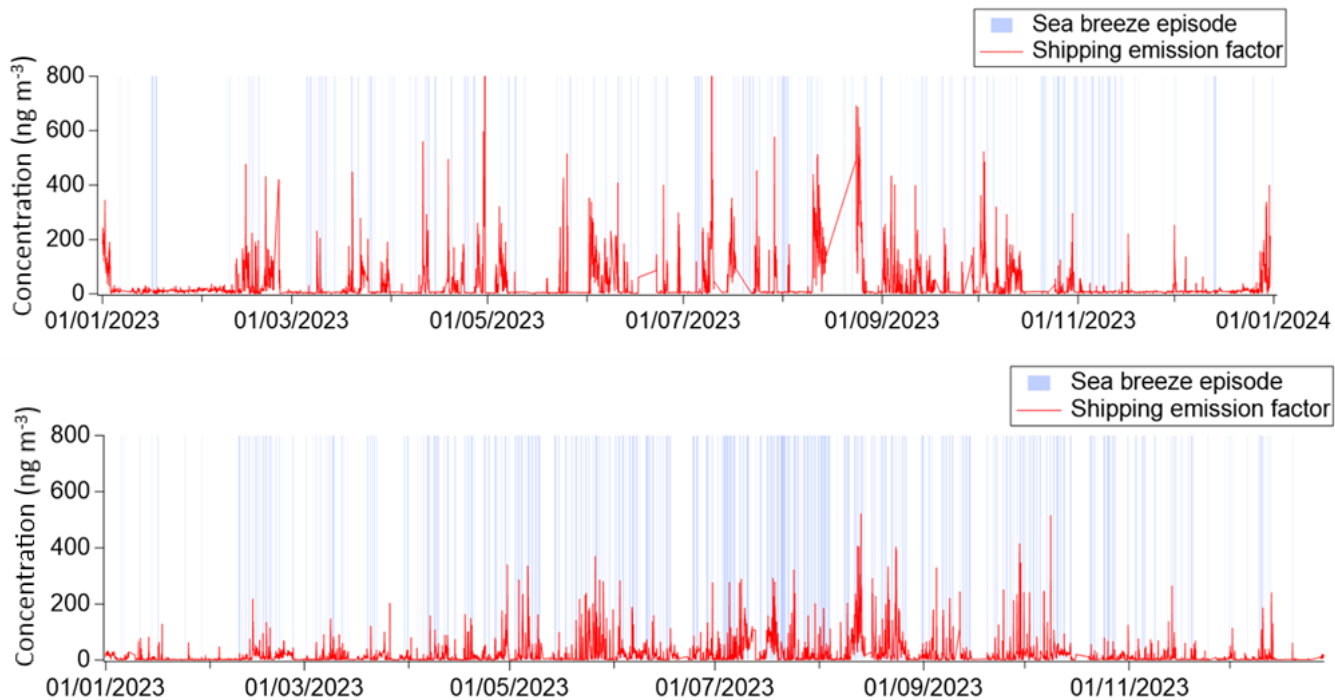

239

240

Figure S20: Shipping emission factor time series at FOS (top) and MRS-LCP (bottom) with sea breeze episodes at each station.

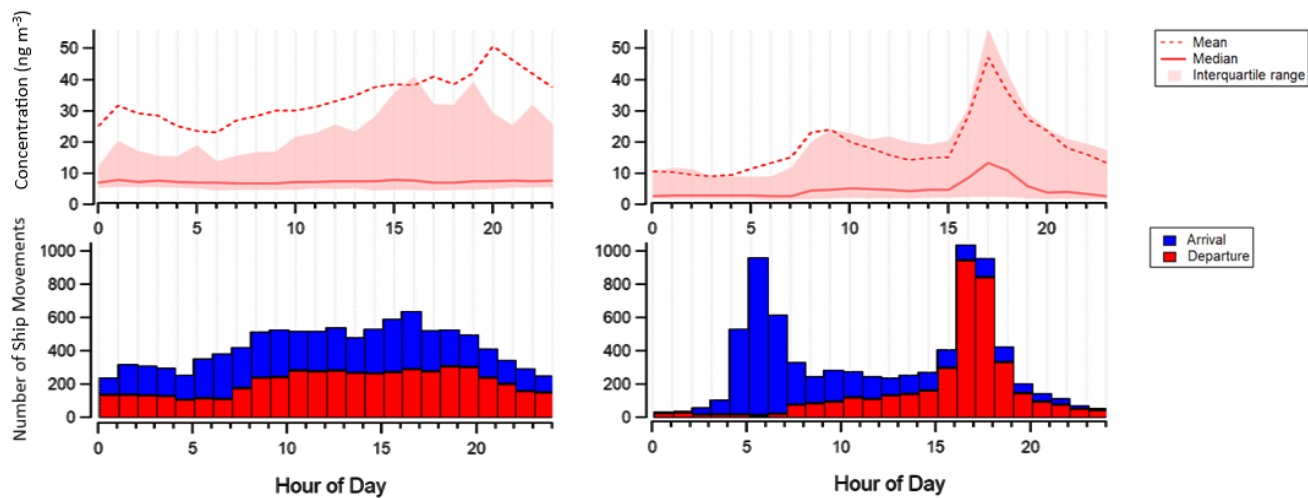

241

242

243

Figure S21: Diurnal profile of the Shipping factor (top) at FOS (left) and MRS-LCP (right) and cumulated number of ship movement (bottom) at Fos-sur-Mer harbour (left) and Marseille harbour (right) (GPM).

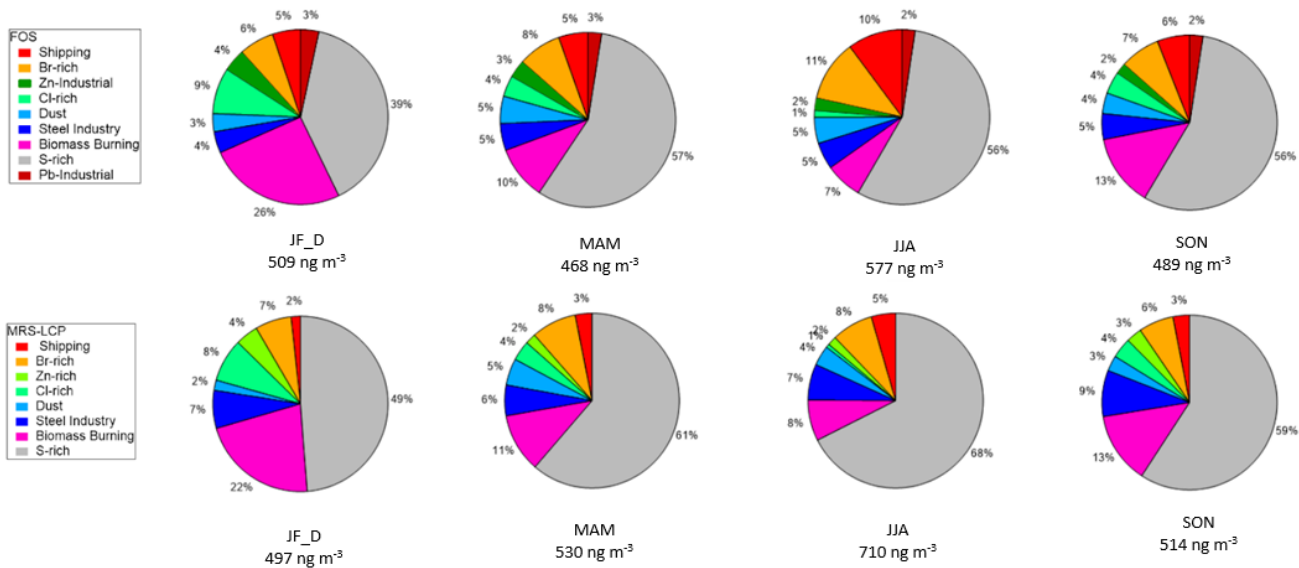

244

245 **Figure S22: Pie chart showing the mass contribution of final Rolling Xact PMF factors, sliced in different seasons, for FOS (top) and**  
 246 **MRS-LCP (bottom).**

247

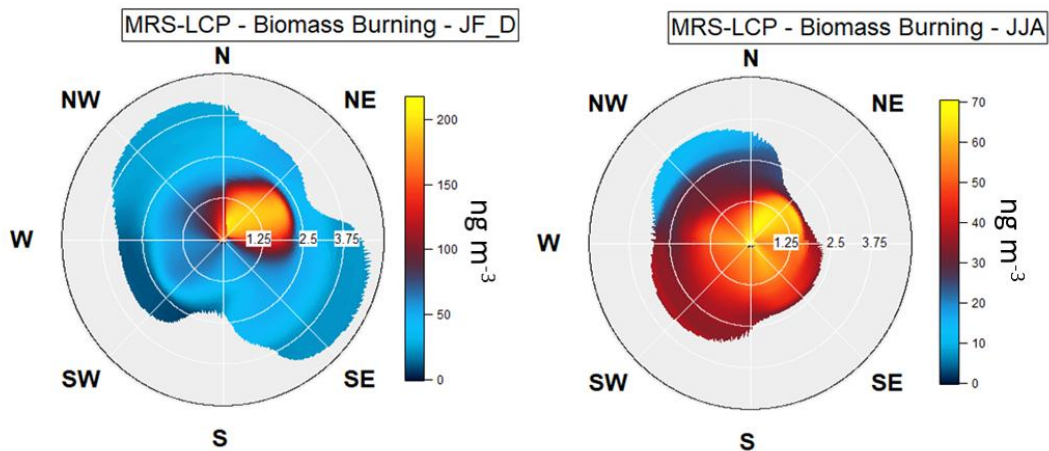

248

249 **Figure S23: NWR of the Biomass Burning factor at MRS-LCP during JF\_D (left) and JJA (right)**

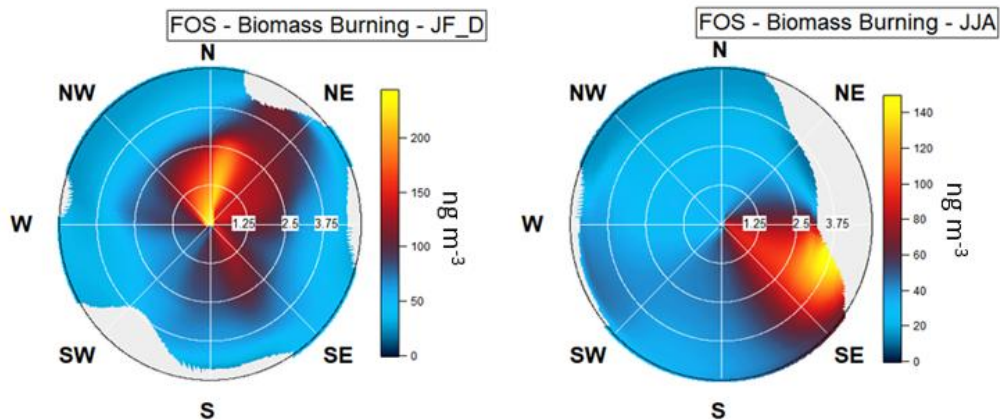

250

251 **Figure S24: NWR of the Biomass Burning factor at FOS during JF\_D (left) and JJA (right)**

252

R Pearson Correlation Heatmap

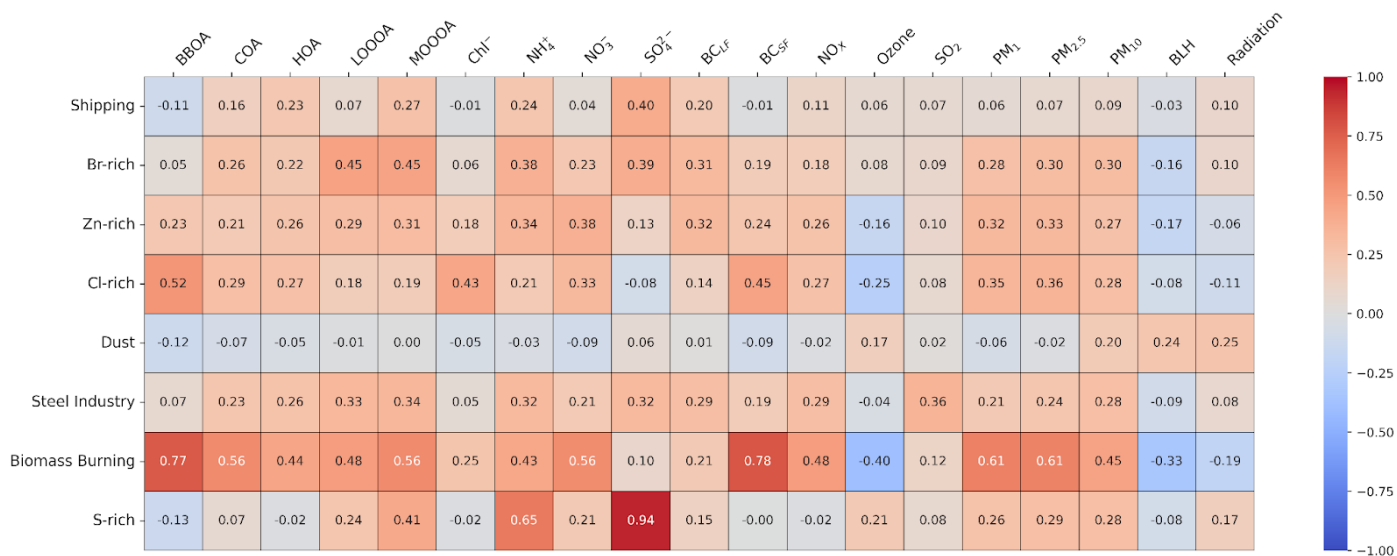

253

254 **Figure S25: Heatmap of  $R_{\text{Pearson}}$  correlation coefficient for Rolling PMF factors vs. external data (ToF-ACSM SIA and Rolling PMF**  
 255 **OA, BC<sub>SF</sub> and BC<sub>LF</sub> from AE33, NO<sub>x</sub>, Ozone, SO<sub>2</sub>, PM<sub>1</sub>, PM<sub>2.5</sub>, PM<sub>10</sub> from FIDAS, BLH and shortwave radiation from Open-Meteo)**  
 256 **at MRS-LCP.**

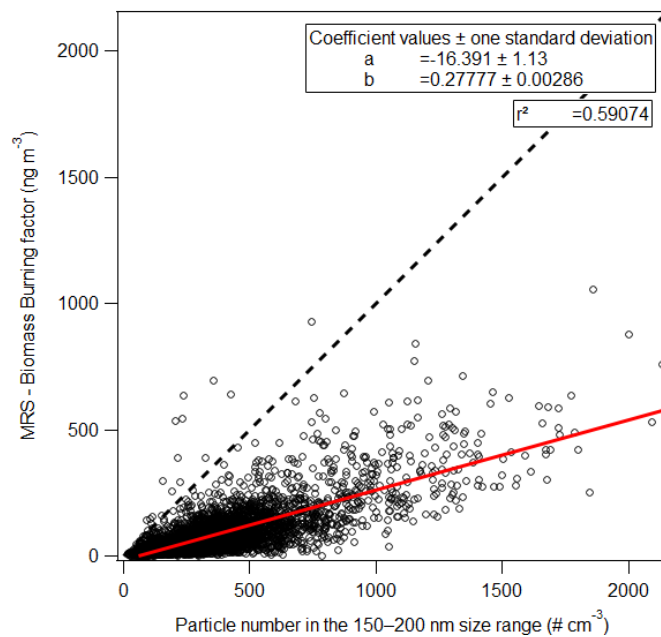

257  
258  
259

**Figure S26: Linear correlation between Xact Biomass Burning factor and particle number in the 150-200 nm size range, at MRS-LCP**

R Pearson Correlation Heatmap

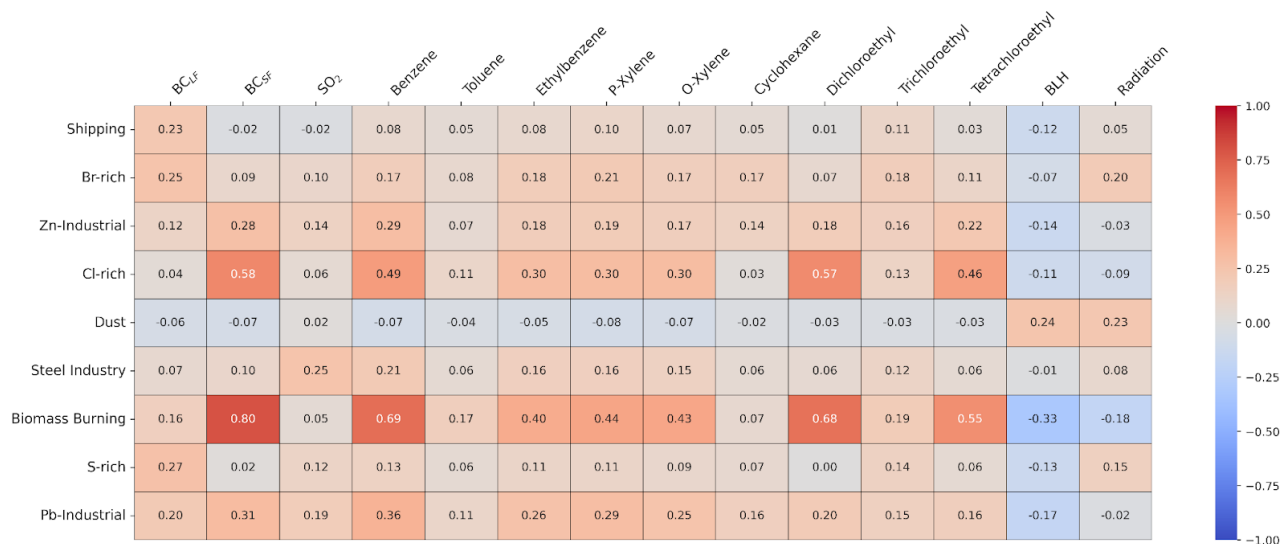

260  
261  
262

**Figure S27: Heatmap of R<sub>Pearson</sub> correlation coefficient for Rolling PMF factors vs. external data (BC<sub>SF</sub> and BC<sub>LF</sub> from AE33, SO<sub>2</sub>, VOCs, BLH and shortwave radiation from Open-Meteo) at FOS.**

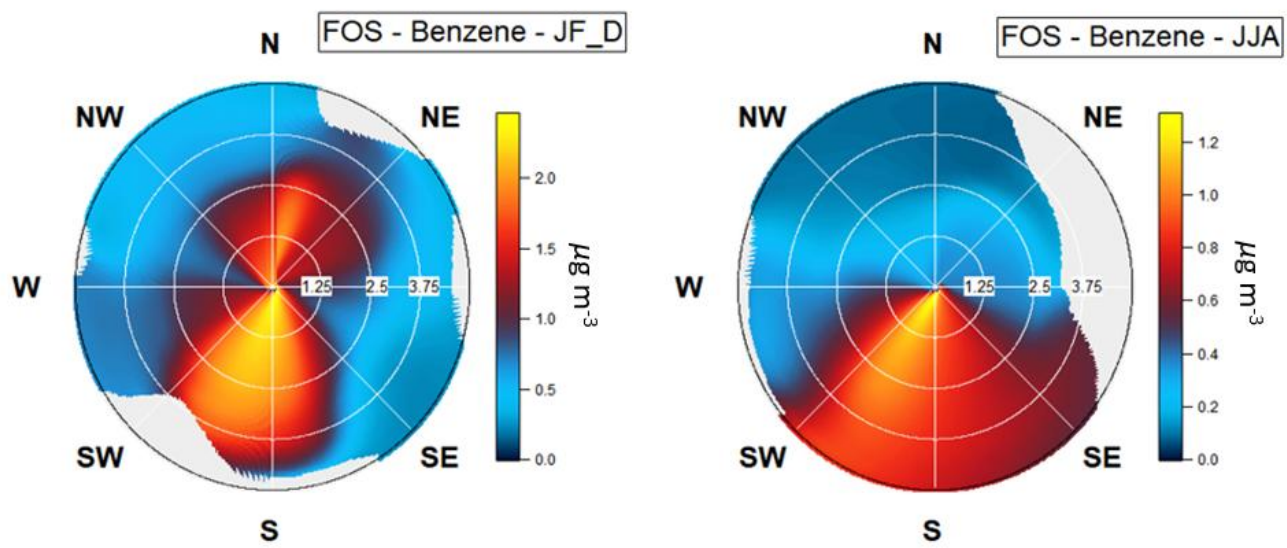

264

265 **Figure S28: NWR of the Benzene at FOS during JF\_D (left) and JJA (right)**

266

267

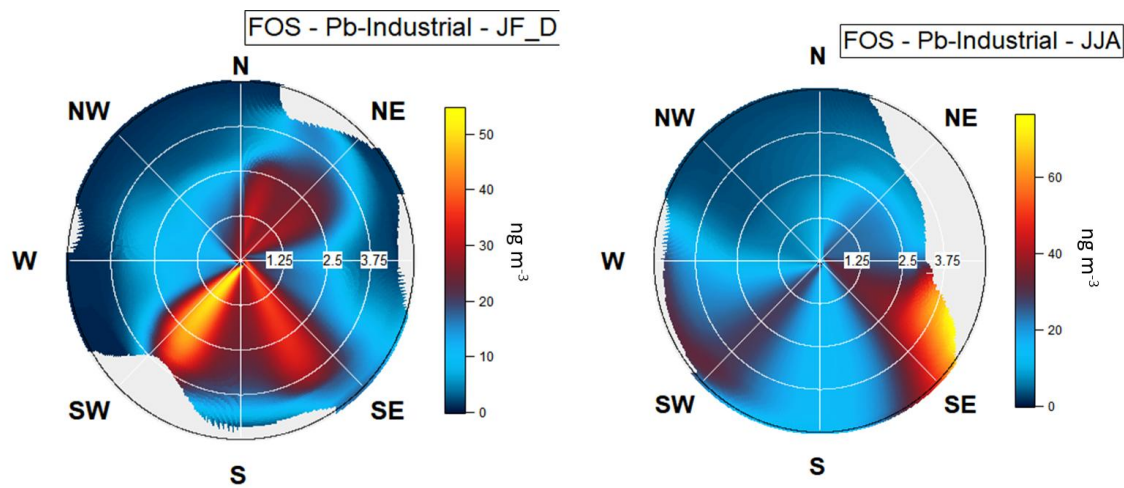

268

269 **Figure S29: NWR of the Pb-Industrial factor at FOS during JF\_D (left) and JJA (right)**

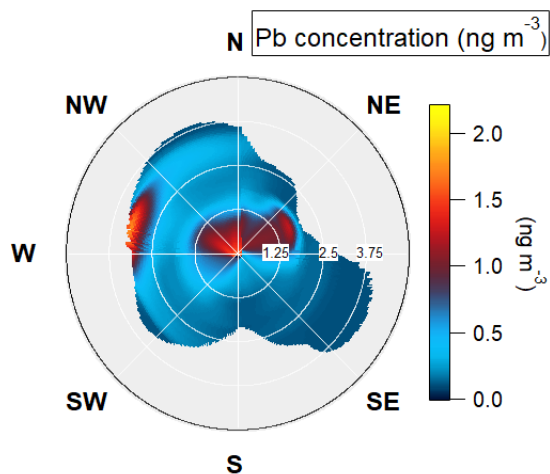

270

271 **Figure S30: NWR of the Pb element at MRS-LCP.**

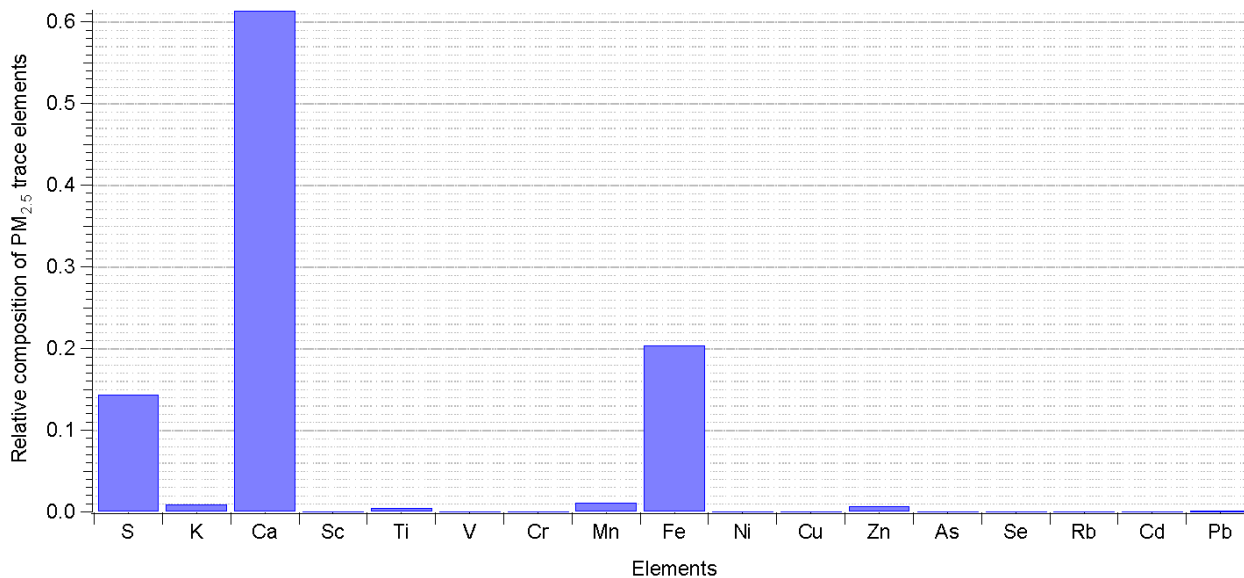

272

273 **Figure S31: Relative composition of  $\text{PM}_{2.5}$  trace elements for the 4 treatment units in the steel industry complex of Fos-sur-Mer,**  
 274 **adapted from Sylvestre et al., 2017. Filters were collected at various locations downwind of the treatment units. Trace elements and**  
 275 **major ions ( $\text{SO}_4^{2-}$ ,  $\text{NO}_3^-$ ,  $\text{NH}_4^+$ ,  $\text{Na}^+$ ,  $\text{K}^+$ ,  $\text{Mg}^{2+}$  and  $\text{Ca}^{2+}$ ) were analyzed using ion chromatography. Elemental sulfur contribution**  
 276 **was estimated using the molar mass ratio of sulfate to sulfur of (3:1).**

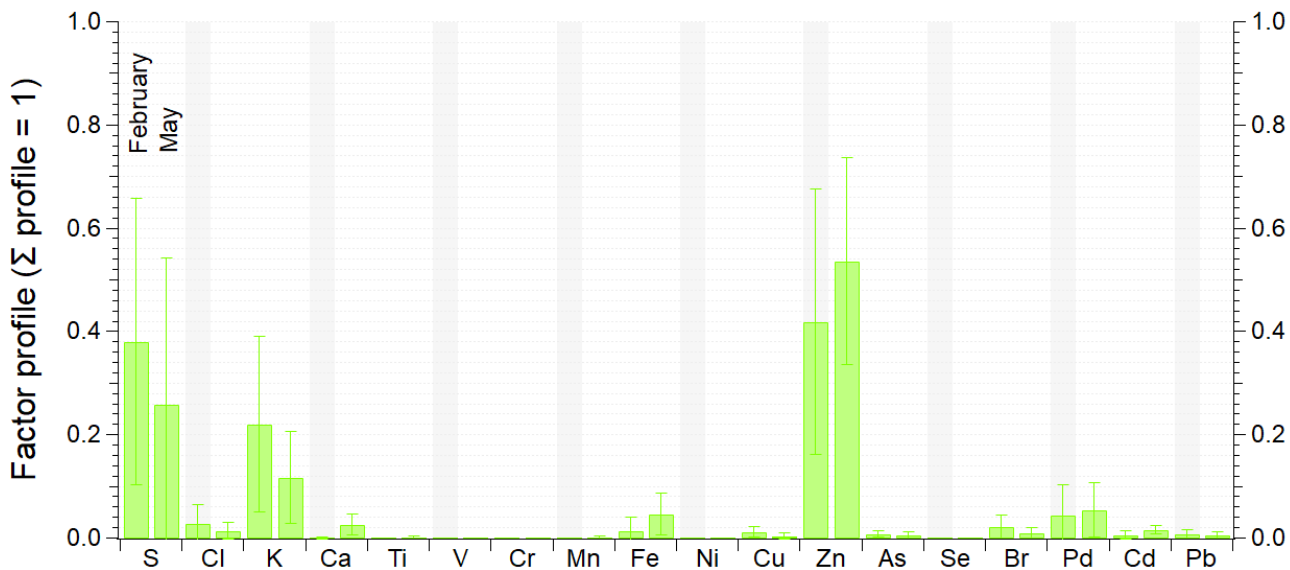

277  
 278 **Figure S32: Zn-rich factor composition at different times of the year (February, left bars; May, right bars) at MRS-LCP. Colored**  
 279 **bars represent the average rolling factor composition for each month, and error bars indicate the standard deviation.**

280

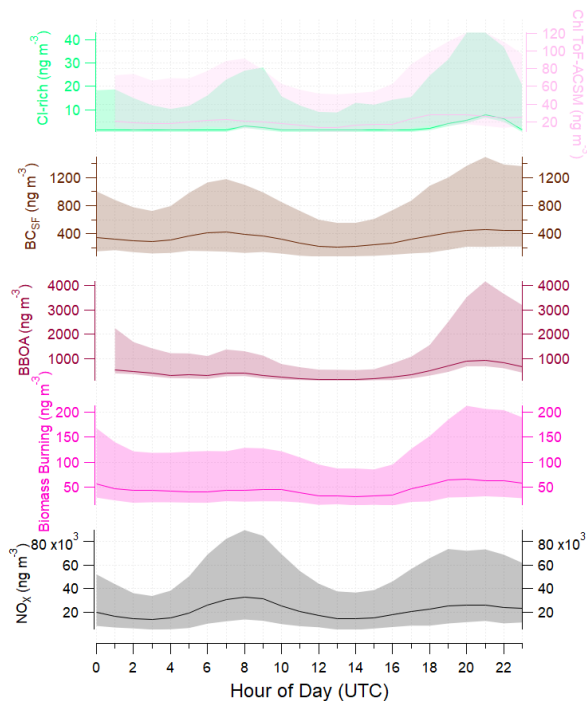

281  
 282 **Figure S33: Median diurnal cycles for BBOA,  $\text{BC}_{\text{SF}}$ ,  $\text{NO}_x$ , Biomass Burning and Cl-rich Xact Rolling PMF factors at MRS-LCP.**  
 283 **The light-colored areas show the interquartile range.**

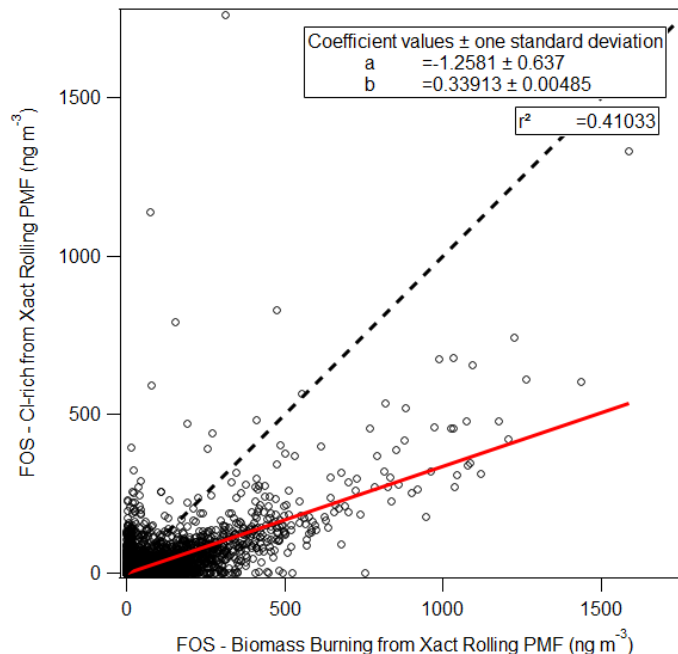

284

285 **Figure S34: Linear correlation between Xact Biomass Burning and Cl-rich factors at FOS**

286 **S6: Sea Salt Dechlorination**

287 Another potential source of particulate chlorine is sea salt dechlorination (Jordan et al., 2015), however it was not considered  
 288 dominant in this case for the following reasons: a) Particle size: Sea salt is primarily emitted in the coarse fraction, while  
 289 chlorine formation via acid displacement is more efficient in fine particles (Faxon & Allen, 2013). b) Seasonality: The Cl-rich  
 290 factor peaked in winter, when thermal breezes that could transport marine aerosols are less frequent. c) Isotopic ratio (Fig.  
 291 S35): to test for a sea salt origin, the  $\text{Na}^{35}/\text{Na}^{37}$  ratio was examined using the  $m/z$  58 /  $m/z$  60 ratio in ToF-ACSM data at MRS-  
 292 LCP. The typical sea salt ratio is  $\sim 3.1$  (De Laeter et al., 2003), but values at MRS-LCP were generally lower (median: 1.63),  
 293 particularly in winter ( $\sim 0.8$ ), likely due to levoglucosan interference at  $m/z$  60. d) NWR analysis: No dominant marine origin  
 294 was observed, the factor had varied source directions, a few consistent with sea salt. e) Sea-salt aerosol is not expected to be  
 295 a dominant contributor in the Mediterranean environment, as reduced wave breaking limits sea-salt emission. f) Weak  
 296 correlation is observed between the chlorine signals from the ToF-ACSM and the Xact at MRS-LCP ( $R^2 = 0.44$ , Fig. S36).  
 297 Previous studies also indicate that this poor correlation might be related to the lack of chlorine calibration on the MRS-LCP  
 298 ToF-ACSM, and to the mostly refractory nature of NaCl, who tends to tends to bounce off the ToF-ACSM's vaporizer, without  
 299 capture system (Ovadnevaite et al., 2012; Tobler et al., 2020; Sustrena et al., 2024). Finally, a slight overestimation of chlorine  
 300 by the ToF-ACSM compared to Xact is observed (Fig. S36), which suggests substantial errors in chlorine estimation by the  
 301 ACSM (Tobler et al., 2020), possibly due to organochloride misclassification (Wang and Ruiz, 2017).

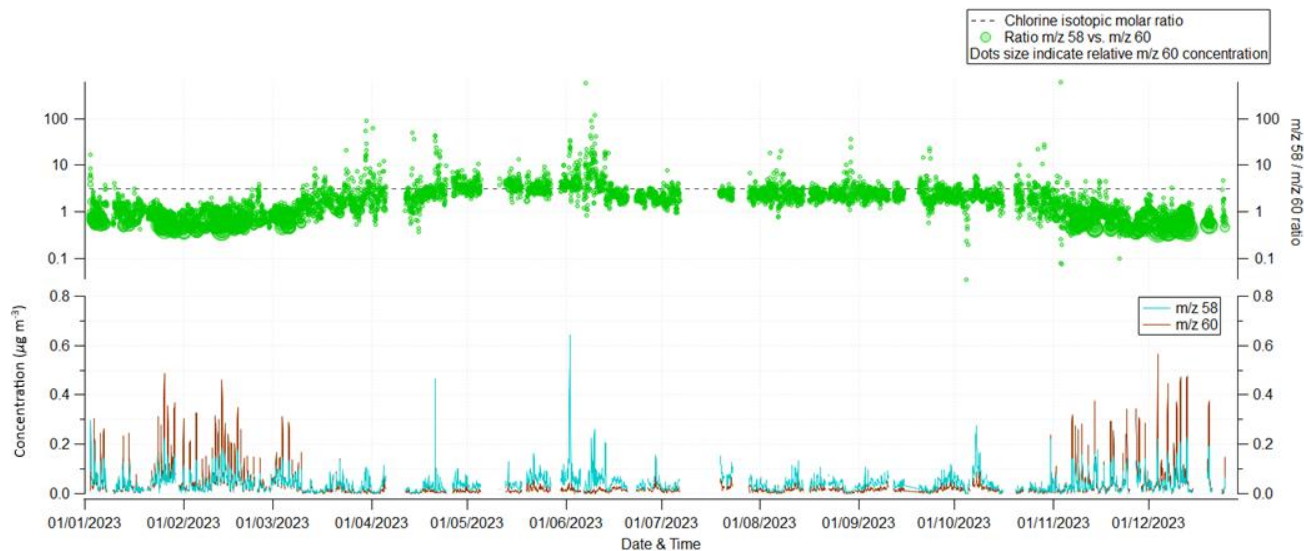

302  
303  
304

Figure S35: Time series of m/z 58 and m/z 60 from the ToF-ACSM at the MRS-LCP station over the year 2023 (bottom) and ratio of the 2 fragments compared to the chlorine isotopic molar ratio (top).

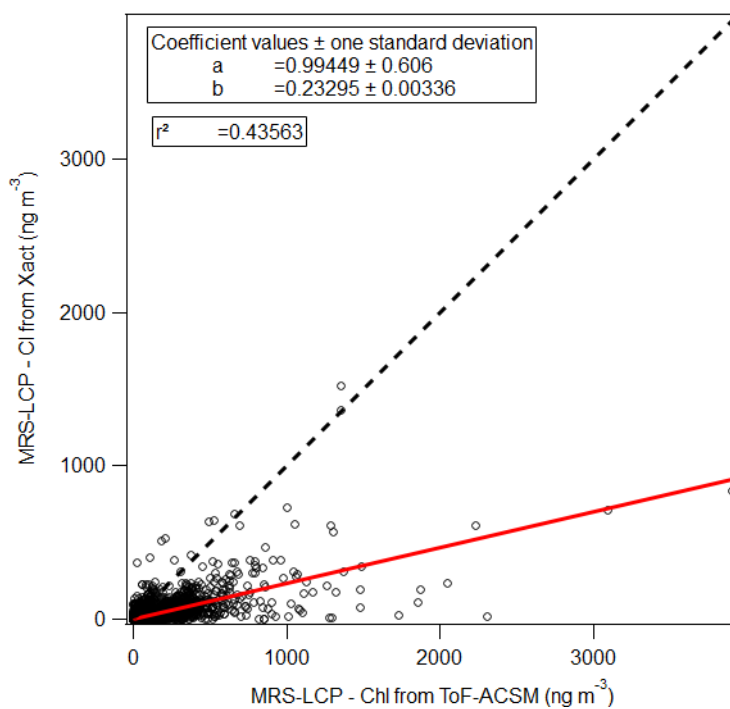

305  
306  
307

Figure S36: Linear correlation of the Cl from Xact and the Chl from ToF-ACSM at MRS-LCP, 2023.

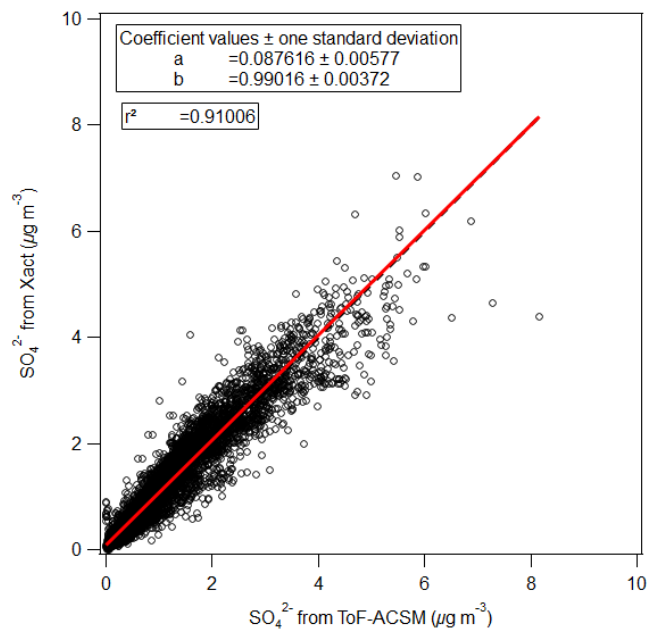

308

309 **Figure S37: Linear correlation between sulfate mass reconstructed from the elemental S (Xact) and sulfate concentrations measured**  
 310 **by ACSM, for MRS-LCP. The sulfate mass from the elemental S is estimated by applying a multiplication factor of 3, corresponding**  
 311 **to the molar mass ratio of sulfate to elemental sulfur (Furger et al., 2017).**

312

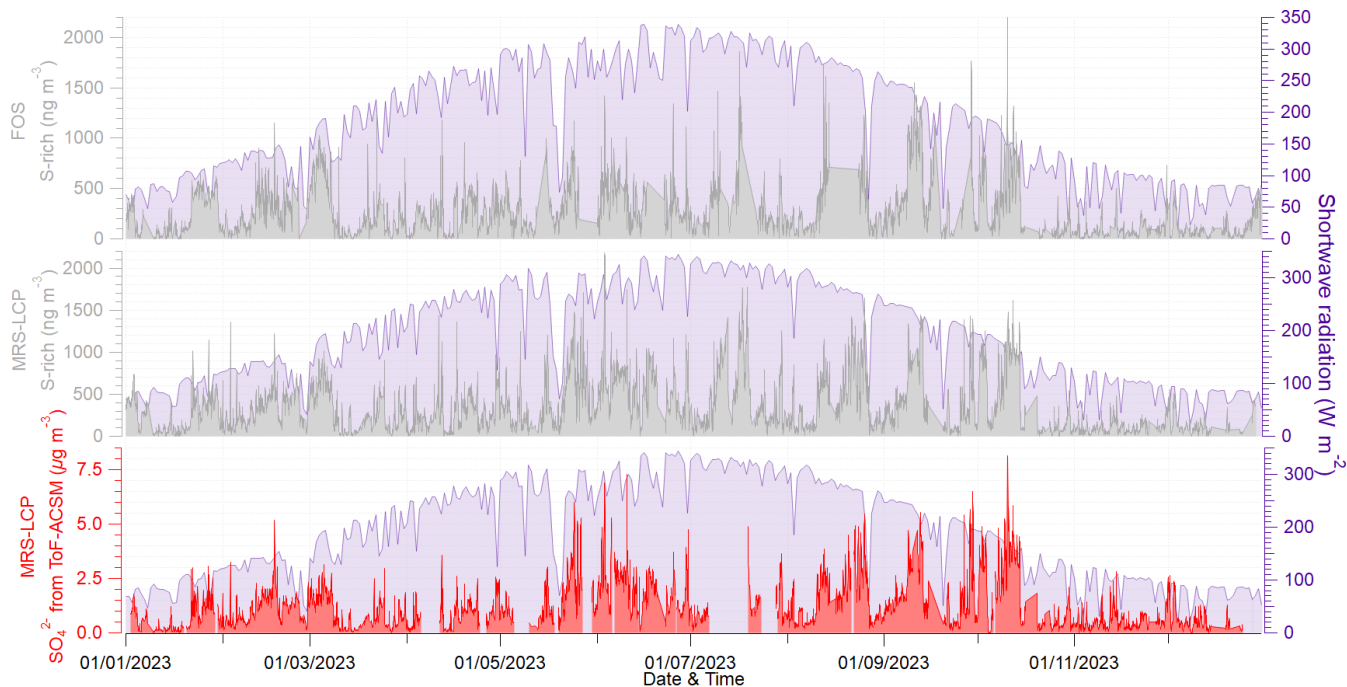

313

314 **Figure S38: Time series of S-rich factor concentrations and shortwave radiation at FOS (top) and MRS-LCP (bottom), respectively,**  
315 **and SO<sub>4</sub><sup>2-</sup> from ToF-ACSM (MRS-LCP).**

## 316 **References**

- 317 Belis, C. A., Pernigotti, D., Karagulian, F., Pirovano, G., Larsen, B. R., Gerboles, M., and Hopke, P. K.: A new methodology  
318 to assess the performance and uncertainty of source apportionment models in intercomparison exercises, *Atmospheric*  
319 *Environment*, 119, 35–44, <https://doi.org/10.1016/j.atmosenv.2015.08.002>, 2015.
- 320 Belis, C. A., Pikridas, M., Lucarelli, F., Petralia, E., Cavalli, F., Calzolari, G., Berico, M., and Sciare, J.: Source apportionment  
321 of fine PM by combining high time resolution organic and inorganic chemical composition datasets, *Atmospheric*  
322 *Environment: X*, 3, 100046, <https://doi.org/10.1016/j.aeoa.2019.100046>, 2019.
- 323 Bougiatioti, A., Stavroulas, I., Kostenidou, E., Zampas, P., Theodosi, C., Kouvarakis, G., Canonaco, F., Prévôt, A. S. H.,  
324 Nenes, A., Pandis, S. N., and Mihalopoulos, N.: Processing of biomass-burning aerosol in the eastern Mediterranean during  
325 summertime, *Atmos. Chem. Phys.*, 14, 4793–4807, <https://doi.org/10.5194/acp-14-4793-2014>, 2014.
- 326 Brown, S. G., Eberly, S., Paatero, P., and Norris, G. A.: Methods for estimating uncertainty in PMF solutions: Examples with  
327 ambient air and water quality data and guidance on reporting PMF results, *Science of The Total Environment*, 518–519, 626–  
328 635, <https://doi.org/10.1016/j.scitotenv.2015.01.022>, 2015.
- 329 Camman, J., Chazeau, B., Marchand, N., Durand, A., Gille, G., Lanzi, L., Jaffrezo, J.-L., Wortham, H., and Uzu, G.: Oxidative  
330 potential apportionment of atmospheric PM<sub>1</sub>: A new approach combining high-sensitive online analysers for chemical  
331 composition and offline OP measurement technique, <https://doi.org/10.5194/egusphere-2023-1441>, 2024.
- 332 Canonaco, F., Tobler, A., Chen, G., Sosedova, Y., Slowik, J. G., Bozzetti, C., Daellenbach, K. R., El Haddad, I., Crippa, M.,  
333 Huang, R.-J., Furger, M., Baltensperger, U., and Prévôt, A. S. H.: A new method for long-term source apportionment with  
334 time-dependent factor profiles and uncertainty assessment using SoFi Pro: application to 1 year of organic aerosol data, *Atmos.*  
335 *Meas. Tech.*, 14, 923–943, <https://doi.org/10.5194/amt-14-923-2021>, 2021.
- 336 Efron, B. “Bootstrap Methods: Another Look at the Jackknife.” *The Annals of Statistics*, vol. 7, no. 1, pp. 1–26. JSTOR,  
337 <http://www.jstor.org/stable/2958830>, 1979.
- 338 Faxon, C. B. and Allen, D. T.: Chlorine chemistry in urban atmospheres: a review, *Environ. Chem.*, 10, 221,  
339 <https://doi.org/10.1071/EN13026>, 2013.
- 340 De Laeter, J. R., Böhlke, J. K., De Bièvre, P., Hidaka, H., Peiser, H. S., Rosman, K. J. R., and Taylor, P. D. P.: Atomic weights  
341 of the elements: Review 2000 (IUPAC Technical Report), *Pure Appl. Chem.*, 75, 683–800, 2003.
- 342 Fossum, K. N., Lin, C., O’Sullivan, N., Lei, L., Hellebust, S., Ceburnis, D., Afzal, A., Tremper, A., Green, D., Jain, S.,  
343 Byčenkienė, S., O’Dowd, C., Wenger, J., and Ovadnevaite, J.: Two distinct ship emission profiles for organic-sulfate source  
344 apportionment of PM in sulfur emission control areas, *Atmos. Chem. Phys.*, 24, 10815–10831, [https://doi.org/10.5194/acp-](https://doi.org/10.5194/acp-24-10815-2024)  
345 [24-10815-2024](https://doi.org/10.5194/acp-24-10815-2024), 2024.

346 Furger, M., Minguillón, M. C., Yadav, V., Slowik, J. G., Hüglin, C., Fröhlich, R., Petterson, K., Baltensperger, U., and Prévôt,  
347 A. S. H.: Elemental composition of ambient aerosols measured with high temporal resolution using an online XRF  
348 spectrometer, *Atmos. Meas. Tech.*, 10, 2061–2076, <https://doi.org/10.5194/amt-10-2061-2017>, 2017.

349 Heutte, B.: Measurements of aerosol microphysical and chemical properties in the central Arctic atmosphere during MOSAiC,  
350 n.d.

351 Hopke, P. K., Dai, Q., Li, L., and Feng, Y.: Global review of recent source apportionments for airborne particulate matter,  
352 *Science of The Total Environment*, 740, 140091, <https://doi.org/10.1016/j.scitotenv.2020.140091>, 2020.

353 Jordan, C. E., Pszenny, A. A. P., Keene, W. C., Cooper, O. R., Deegan, B., Maben, J., Routhier, M., Sander, R., and Young,  
354 A. H.: Origins of aerosol chlorine during winter over north central Colorado, USA, *JGR Atmospheres*, 120, 678–694,  
355 <https://doi.org/10.1002/2014JD022294>, 2015.

356 Manigrasso, M., Soggiu, M. E., Settimo, G., Inglessis, M., Protano, C., Vitali, M., and Avino, P.: PM Dimensional  
357 Characterization in an Urban Mediterranean Area: Case Studies on the Separation between Fine and Coarse Atmospheric  
358 Aerosol, *Atmosphere*, 13, 227, <https://doi.org/10.3390/atmos13020227>, 2022.

359 Manousakas, M., Furger, M., Daellenbach, K. R., Canonaco, F., Chen, G., Tobler, A., Rai, P., Qi, L., Tremper, A. H., Green,  
360 D., Hueglin, C., Slowik, J. G., El Haddad, I., and Prevot, A. S. H.: Source identification of the elemental fraction of particulate  
361 matter using size segregated, highly time-resolved data and an optimized source apportionment approach, *Atmospheric  
362 Environment: X*, 14, 100165, <https://doi.org/10.1016/j.aeaoa.2022.100165>, 2022.

363 Ovadnevaite, J., Ceburnis, D., Canagaratna, M., Berresheim, H., Bialek, J., Martucci, G., Worsnop, D. R., and O’Dowd, C.:  
364 On the effect of wind speed on submicron sea salt mass concentrations and source fluxes, *J. Geophys. Res.*, 117,  
365 2011JD017379, <https://doi.org/10.1029/2011JD017379>, 2012.

366 Paatero, P.: The Multilinear Engine: A Table-Driven, Least Squares Program for Solving Multilinear Problems, including the  
367 n-Way Parallel Factor Analysis Model, 2024.

368 Paatero, P., Hopke, P. K., Song, X.-H., and Ramadan, Z.: Understanding and controlling rotations in factor analytic models,  
369 *Chemometrics and Intelligent Laboratory Systems*, 60, 253–264, [https://doi.org/10.1016/S0169-7439\(01\)00200-3](https://doi.org/10.1016/S0169-7439(01)00200-3), 2002.

370 Pernigotti, D. and Belis, C. A.: DeltaSA tool for source apportionment benchmarking, description and sensitivity analysis,  
371 *Atmospheric Environment*, 180, 138–148, <https://doi.org/10.1016/j.atmosenv.2018.02.046>, 2018.

372 Paatero, P. and Hopke, P. K.: Discarding or downweighting high-noise variables in factor analytic models, *Analytica Chimica  
373 Acta*, 490, 277–289, [https://doi.org/10.1016/S0003-2670\(02\)01643-4](https://doi.org/10.1016/S0003-2670(02)01643-4), 2003.

374 Pernigotti, D., Belis, C. A., and Spanò, L.: SPECIEUROPE: The European data base for PM source profiles, *Atmospheric  
375 Pollution Research*, 7, 307–314, <https://doi.org/10.1016/j.apr.2015.10.007>, 2016.

376 Rai, P., Furger, M., Slowik, J. G., Canonaco, F., Fröhlich, R., Hüglin, C., Minguillón, M. C., Petterson, K., Baltensperger, U.,  
377 and Prévôt, A. S. H.: Source apportionment of highly time-resolved elements during a firework episode from a rural freeway  
378 site in Switzerland, *Atmospheric Chemistry and Physics*, 20, 1657–1674, <https://doi.org/10.5194/acp-20-1657-2020>, 2020.

379 Reff, A., Eberly, S. I., and Bhave, P. V.: Receptor Modeling of Ambient Particulate Matter Data Using Positive Matrix  
380 Factorization: Review of Existing Methods, *Journal of the Air & Waste Management Association*, 57, 146–154,  
381 <https://doi.org/10.1080/10473289.2007.10465319>, 2007.

382 Sutresna, A., Keywood, M., Paton-Walsh, C., Simmons, J., Mynard, C., Dang, Q., Mochida, M., Ohata, S., Afsana, S., Kunwar,  
383 B., Kawamura, K., Humphries, R., Dunne, E., Ward, J., Harnwell, J., Reisen, F., Emmerson, K., Griffiths, A., Williams, A.,  
384 Schofield, R., and Rayner, P.: Interference of sea salt in capture vaporizer-ToF-ACSM measurements of biomass burning  
385 organic aerosols in coastal locations, *Environ. Sci.: Atmos.*, 4, 634–644, <https://doi.org/10.1039/D3EA00171G>, 2024.

386 Sylvestre, A., Mizzi, A., Mathiot, S., Masson, F., Jaffrezo, J. L., Dron, J., Mesbah, B., Wortham, H., and Marchand, N.:  
387 Comprehensive chemical characterization of industrial PM<sub>2.5</sub> from steel industry activities, *Atmospheric Environment*, 152,  
388 180–190, <https://doi.org/10.1016/j.atmosenv.2016.12.032>, 2017.

389 Tobler, A. K., Skiba, A., Wang, D. S., Croteau, P., Styszko, K., Nęcki, J., Baltensperger, U., Slowik, J. G., and Prévôt, A. S.  
390 H.: Improved chloride quantification in quadrupole aerosol chemical speciation monitors (Q-ACSMs), *Atmos. Meas. Tech.*,  
391 13, 5293–5301, <https://doi.org/10.5194/amt-13-5293-2020>, 2020.

392 Ulbrich, I. M., Canagaratna, M. R., Zhang, Q., Worsnop, D. R., and Jimenez, J. L.: Interpretation of organic components from  
393 Positive Matrix Factorization of aerosol mass spectrometric data, *Atmospheric Chemistry and Physics*, 9, 2891–2918,  
394 <https://doi.org/10.5194/acp-9-2891-2009>, 2009.

395 Via, M., Chen, G., Canonaco, F., Daellenbach, K. R., Chazean, B., Chebaicheb, H., Jiang, J., Keernik, H., Lin, C., Marchand,  
396 N., Marin, C., O’Dowd, C., Ovadnevaite, J., Petit, J.-E., Pikridas, M., Riffault, V., Sciare, J., Slowik, J. G., Simon, L.,  
397 Vasilescu, J., Zhang, Y., Favez, O., Prévôt, A. S. H., Alastuey, A., and Cruz Minguillón, M.: *Rolling vs. seasonal* PMF: real-  
398 world multi-site and synthetic dataset comparison, *Atmos. Meas. Tech.*, 15, 5479–5495, [https://doi.org/10.5194/amt-15-5479-](https://doi.org/10.5194/amt-15-5479-2022)  
399 [2022](https://doi.org/10.5194/amt-15-5479-2022), 2022.

400 Viana, M., Kuhlbusch, T. A. J., Querol, X., Alastuey, A., Harrison, R. M., Hopke, P. K., Winiwarter, W., Vallius, M., Szidat,  
401 S., Prévôt, A. S. H., Hueglin, C., Bloemen, H., Wählin, P., Vecchi, R., Miranda, A. I., Kasper-Giebl, A., Maenhaut, W., and  
402 Hitzenberger, R.: Source apportionment of particulate matter in Europe: A review of methods and results, *Journal of Aerosol*  
403 *Science*, 39, 827–849, <https://doi.org/10.1016/j.jaerosci.2008.05.007>, 2008.

404 Visser, S., Slowik, J. G., Furger, M., Zotter, P., Bukowiecki, N., Canonaco, F., Flechsig, U., Appel, K., Green, D. C., Tremper,  
405 A. H., Young, D. E., Williams, P. I., Allan, J. D., Coe, H., Williams, L. R., Mohr, C., Xu, L., Ng, N. L., Nemitz, E., Barlow,  
406 J. F., Halios, C. H., Fleming, Z. L., Baltensperger, U., and Prévôt, A. S. H.: Advanced source apportionment of size-resolved  
407 trace elements at multiple sites in London during winter, *Atmos. Chem. Phys.*, 15, 11291–11309, [https://doi.org/10.5194/acp-](https://doi.org/10.5194/acp-15-11291-2015)  
408 [15-11291-2015](https://doi.org/10.5194/acp-15-11291-2015), 2015.

409 Wang, D. S. and Ruiz, L. H.: Secondary organic aerosol from chlorine-initiated oxidation of isoprene, *Atmos. Chem. Phys.*,  
410 17, 13491–13508, <https://doi.org/10.5194/acp-17-13491-2017>, 2017.
